# Supplementary material for: Bismuth(iii)dichalcogenones as highly active catalysts in multiple C–C bond formation reactions
Source: Royal Society of Chemistry journal article supplement (doi:10.1039/c5dt04738b), 2016-01-01
Supplement: c5dt04738b1.pdf [file c5dt04738b1.pdf]

## Supporting Information I

### Bismuth(III)dichalcogenones: Highly Active Catalysts in Multiple C–C Bond Formation Reactions

Katam Srinivas, Arruri Sathyanarayana, Chatla Naga Babu and Ganesan Prabusankar\*

Department of Chemistry, Indian Institute of Technology Hyderabad, Kandi,

Medak, TS, INDIA-502 285.

Fax: +91 40 2301 6032; Tel: +91 40 2301 6089; E-mail: [prabu@iith.ac.in](mailto:prabu@iith.ac.in)

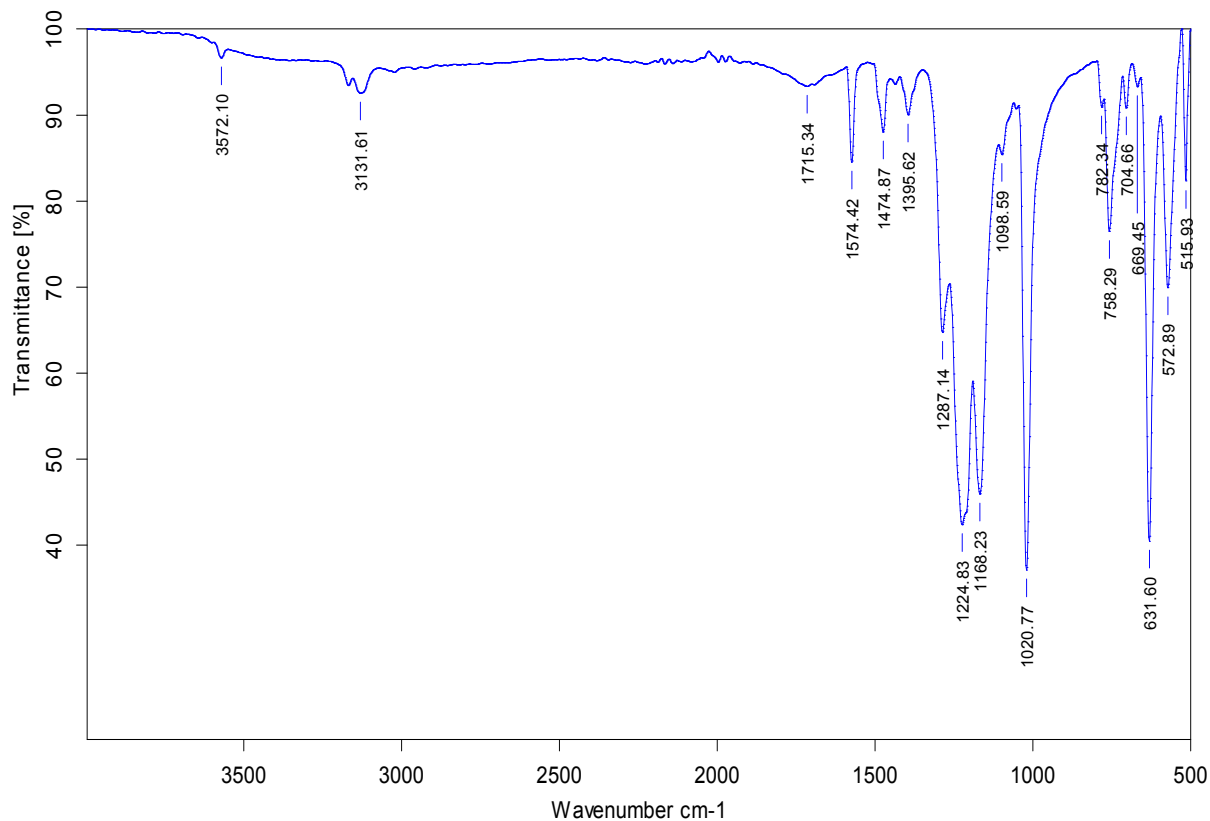

**Fig. S1.** Neat FT-IR spectrum of [(mbit)<sub>3</sub>Bi](OTf)[Bi<sub>6</sub>(OTf)<sub>12</sub>(μ<sub>3</sub>-OH)<sub>8</sub>] (**1**).

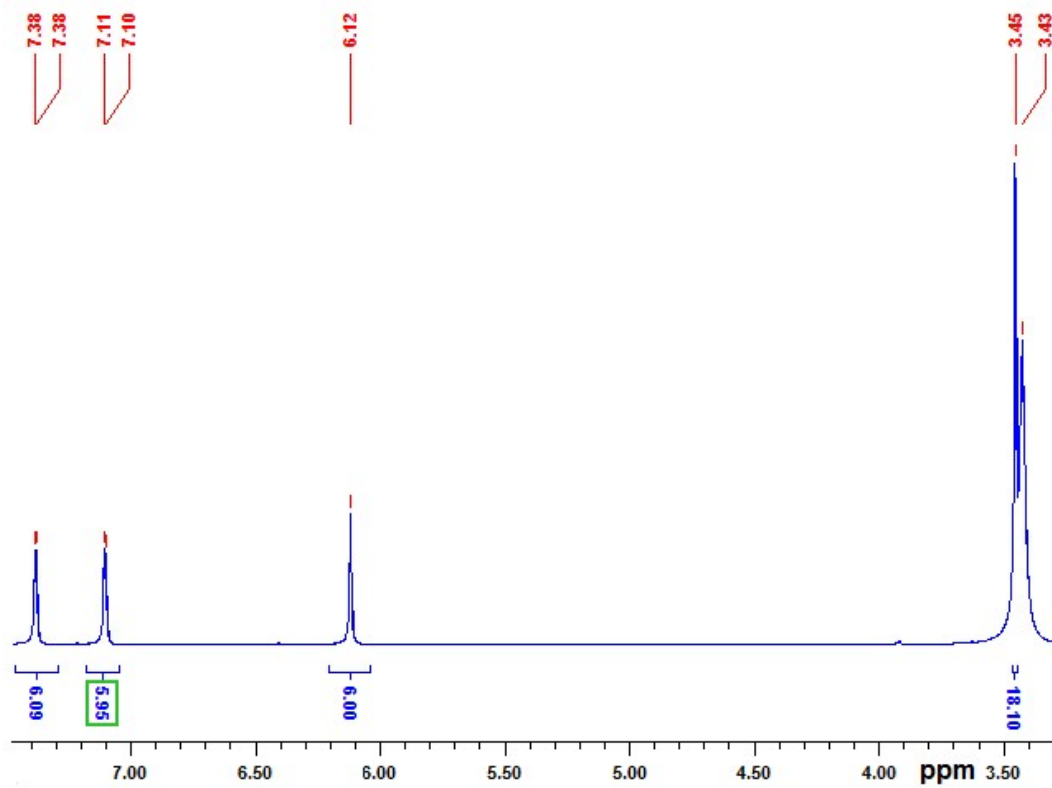

Fig. S2. <sup>1</sup>H NMR spectrum of [(mbit)<sub>3</sub>Bi](OTf)[Bi<sub>6</sub>(OTf)<sub>12</sub>(μ<sub>3</sub>-OH)<sub>8</sub>] (1) in DMSO-d<sub>6</sub> at RT.

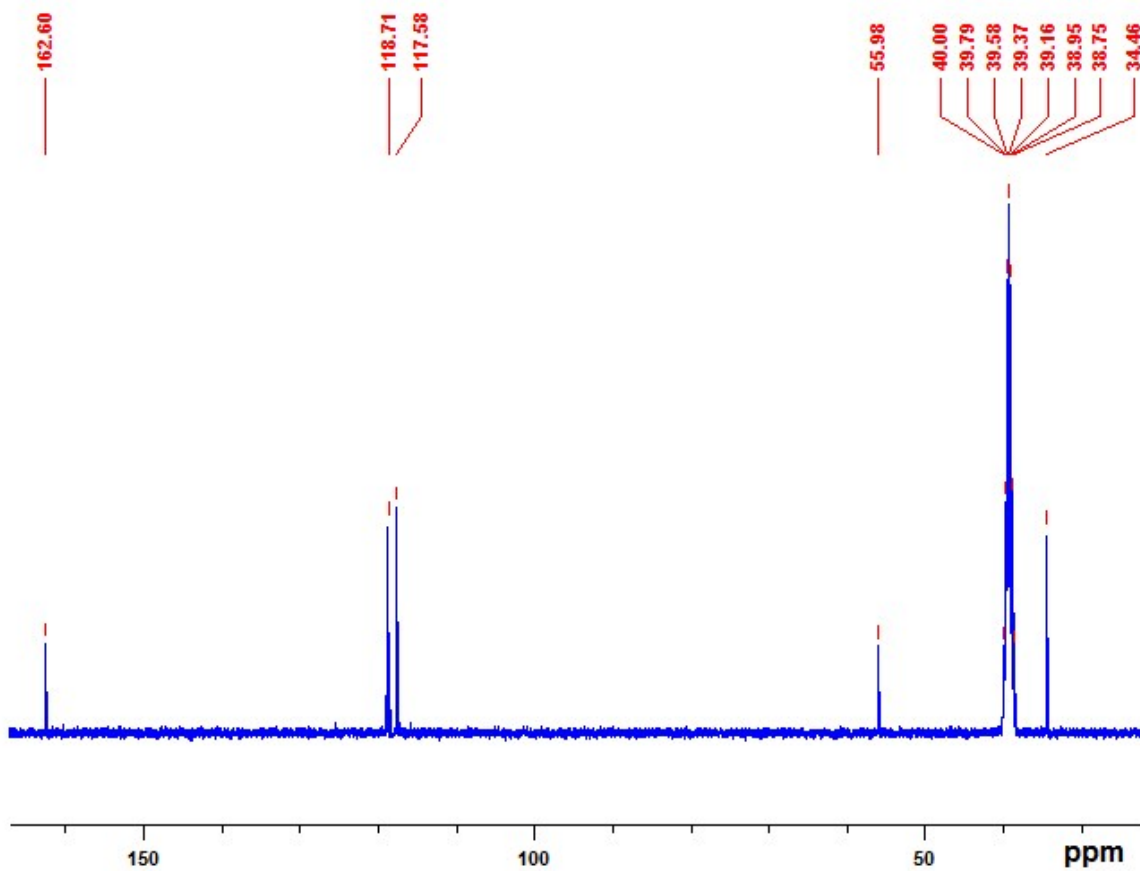

**Fig. S3.**  $^{13}\text{C}$  NMR spectrum of  $[(\text{mbit})_3\text{Bi}](\text{OTf})[\text{Bi}_6(\text{OTf})_{12}(\mu_3\text{-OH})_8]$  (1) in  $\text{DMSO-d}_6$  at RT.

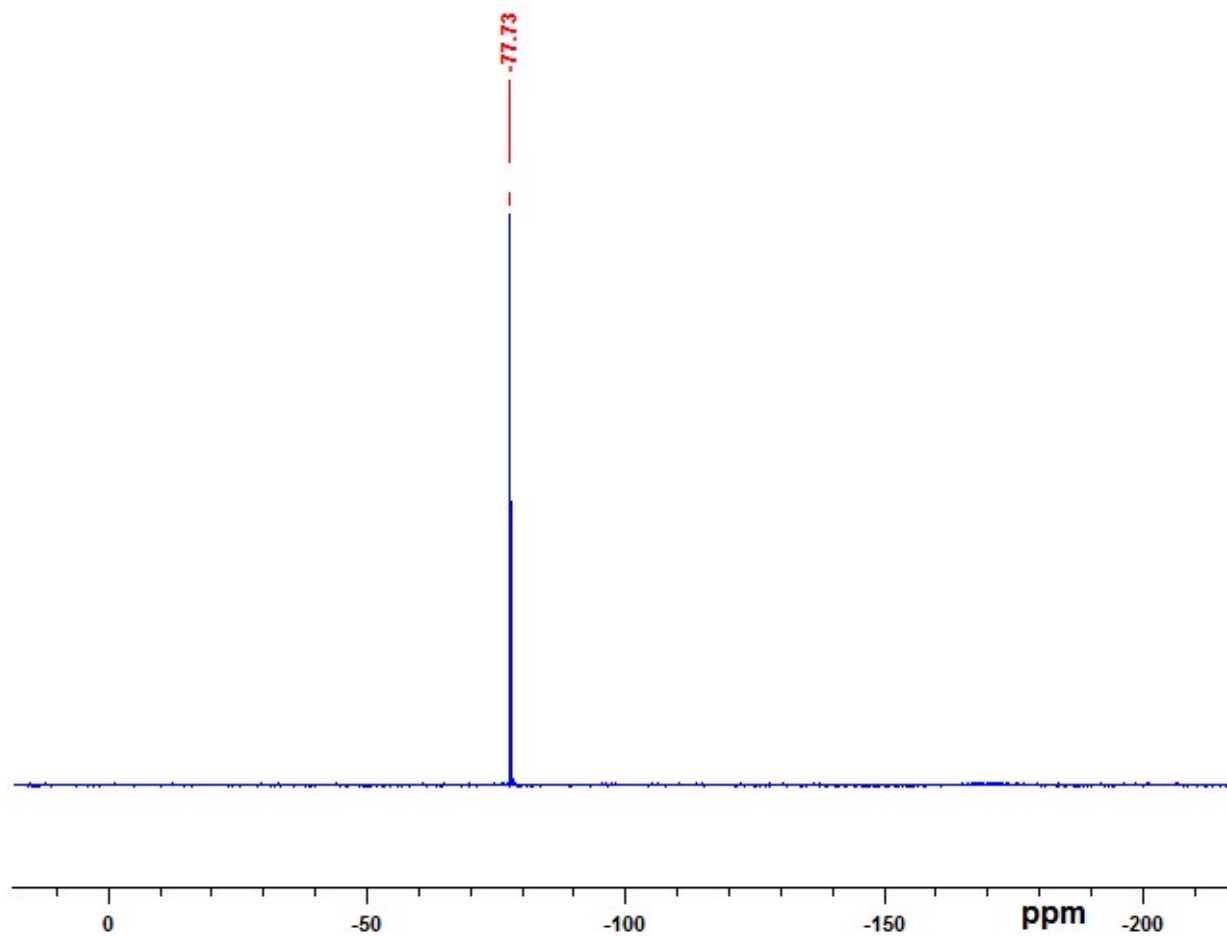

**Fig. S4.**  $^{19}\text{F}$  NMR spectrum of  $[(\text{mbit})_3\text{Bi}](\text{OTf})[\text{Bi}_6(\text{OTf})_{12}(\mu_3\text{-OH})_8]$  (**1**) in  $\text{DMSO-d}_6$  at RT.

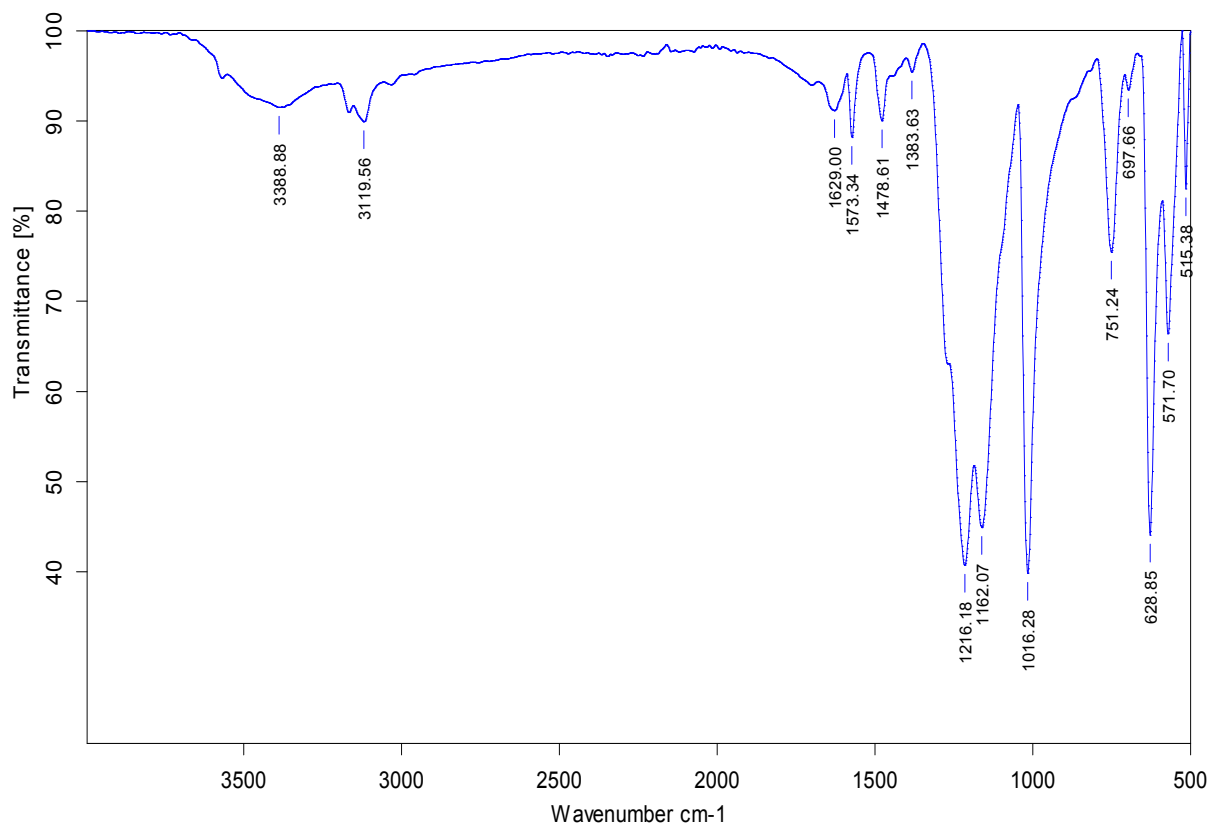

**Fig. S5.** Neat FT-IR spectrum of  $[(mbis)_2(OTf)_2Bi](OTf) \cdot 2CH_3OH$  (2).

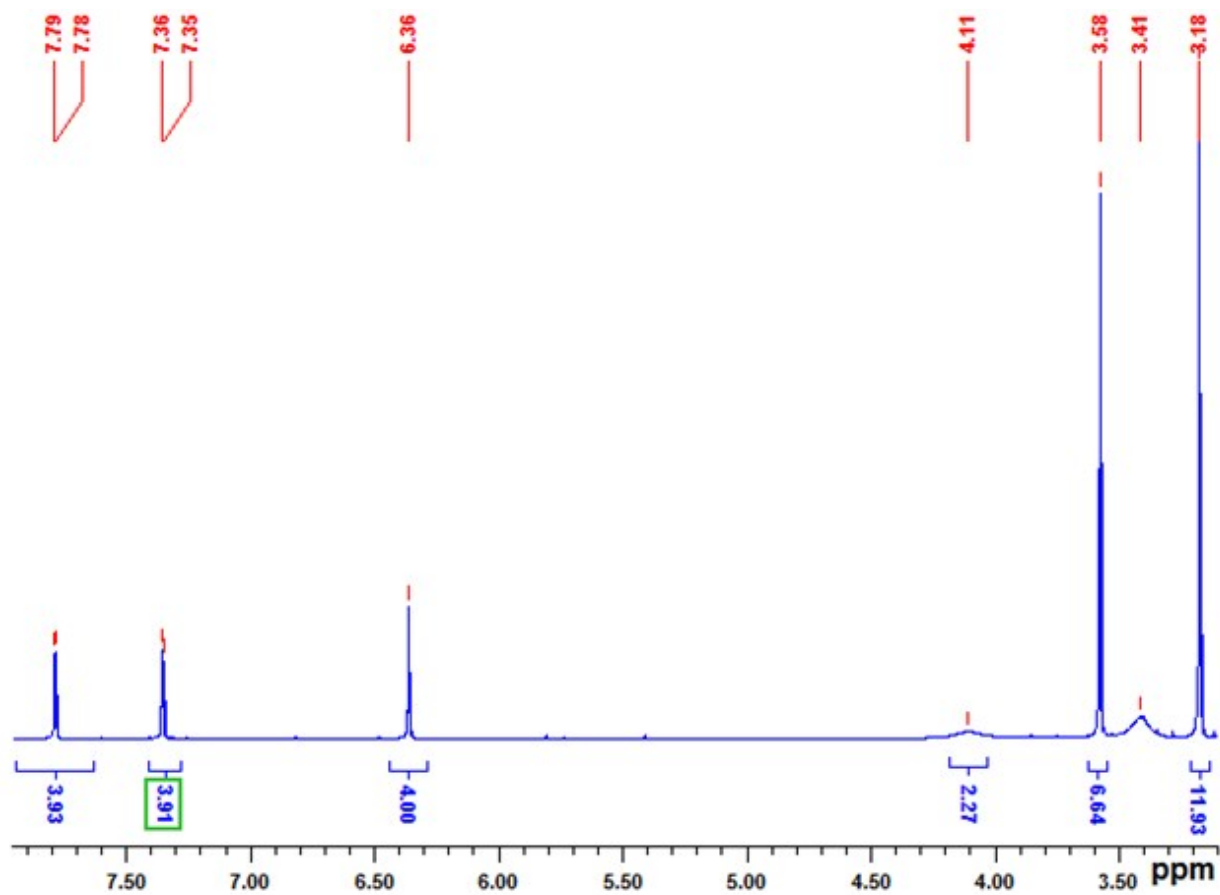

Fig. S6. <sup>1</sup>H NMR spectrum of [(mbis)<sub>2</sub>(OTf)<sub>2</sub>Bi](OTf).2CH<sub>3</sub>OH (2) in DMSO-d<sub>6</sub> at RT.

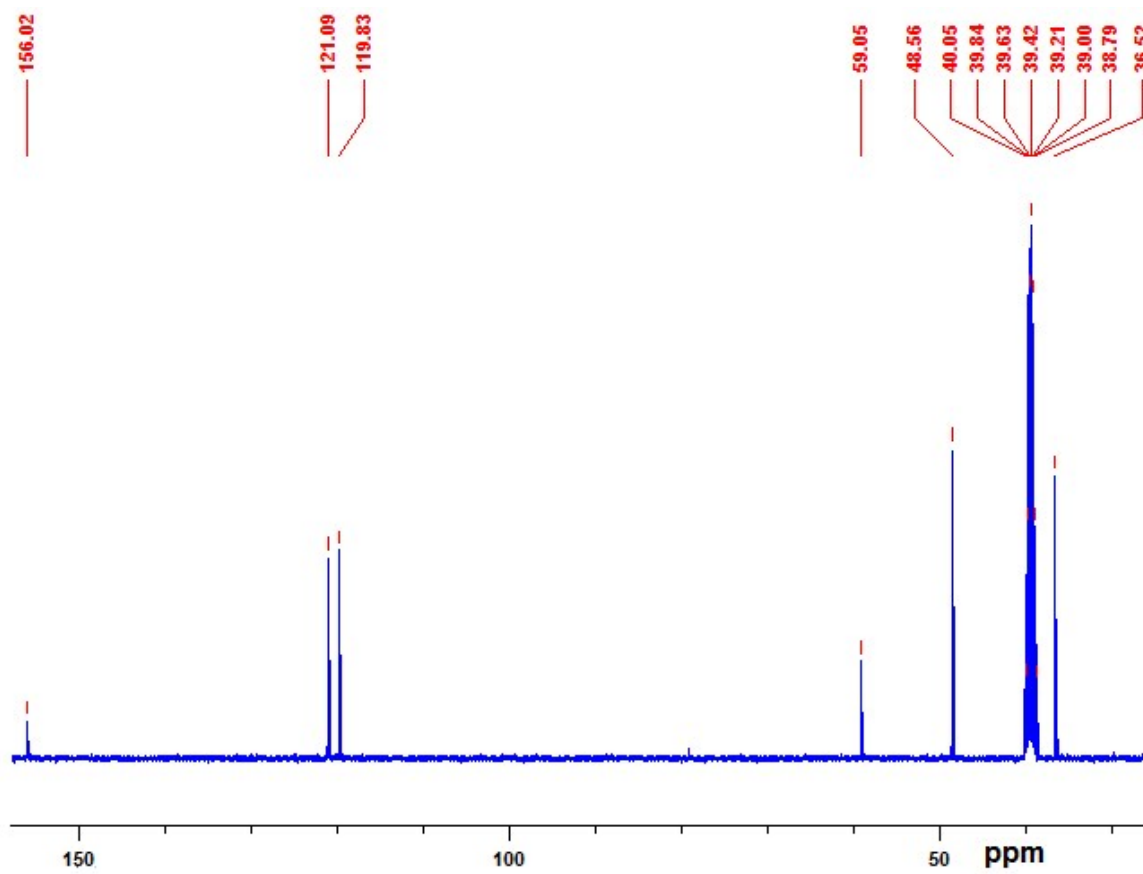

Fig. S7.  $^{13}\text{C}$  NMR spectrum of  $[(\text{mbis})_2(\text{OTf})_2\text{Bi}](\text{OTf}) \cdot 2\text{CH}_3\text{OH}$  (2) in  $\text{DMSO-d}_6$  at RT.

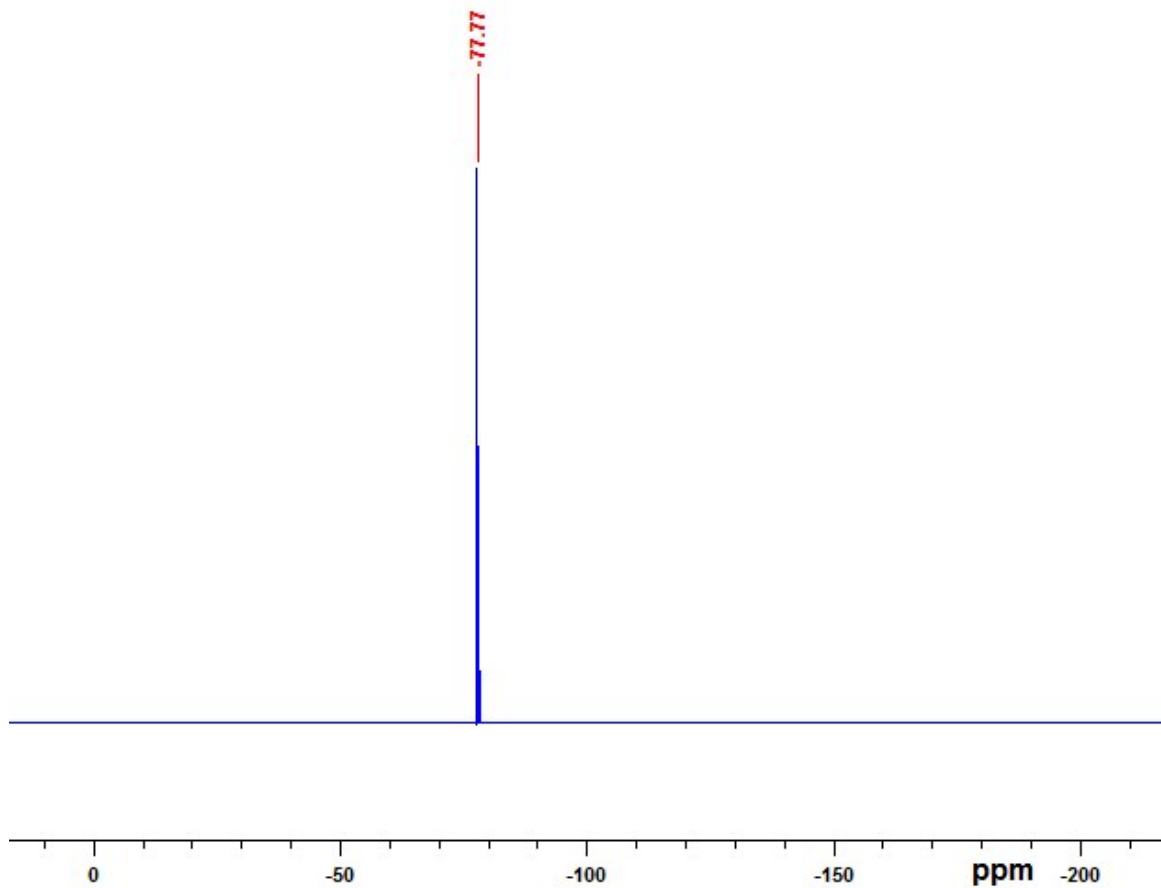

**Fig. S8.**  $^{19}\text{F}$  NMR spectrum of  $[(\text{mbis})_2(\text{OTf})_2\text{Bi}](\text{OTf}) \cdot 2\text{CH}_3\text{OH}$  (**2**) in  $\text{DMSO-d}_6$  at RT.



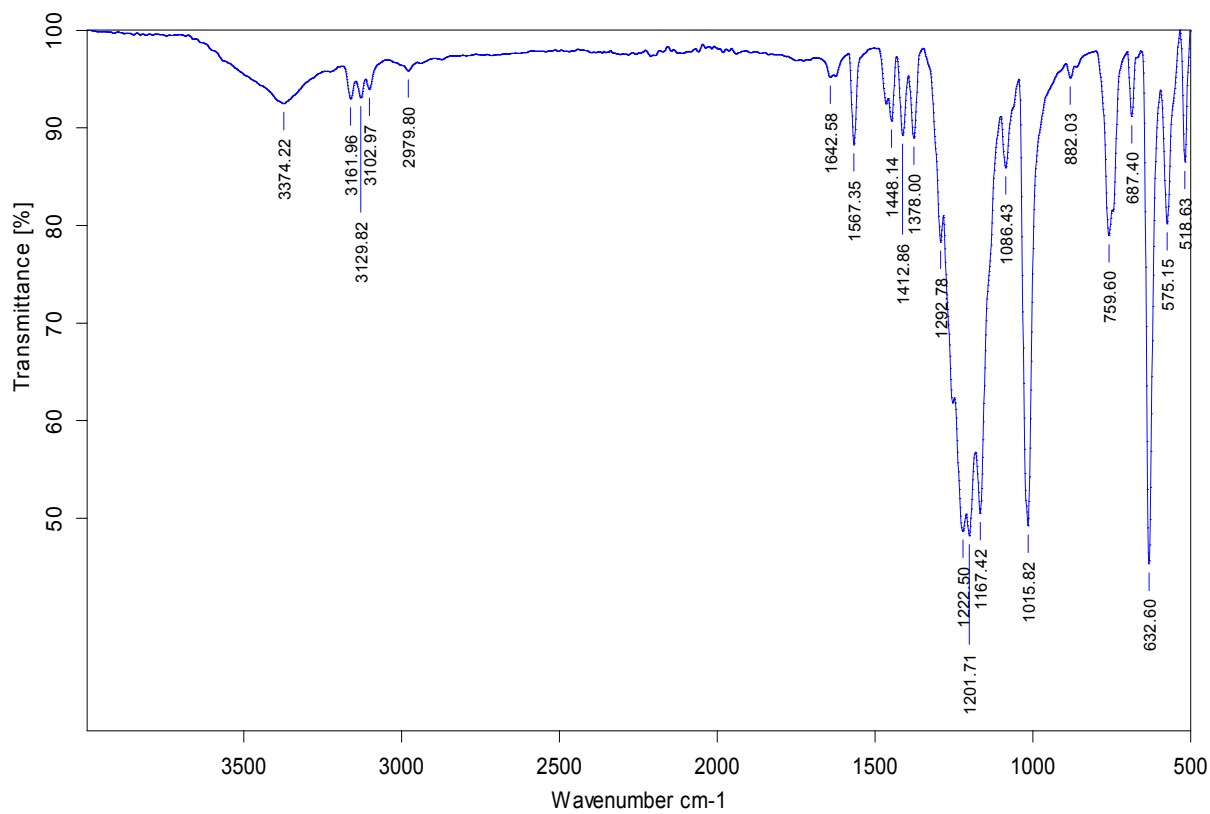

Fig. S9. Neat FT-IR spectrum of  $[(mbpit)_2(OTf)_2Bi](OTf)$  (3).

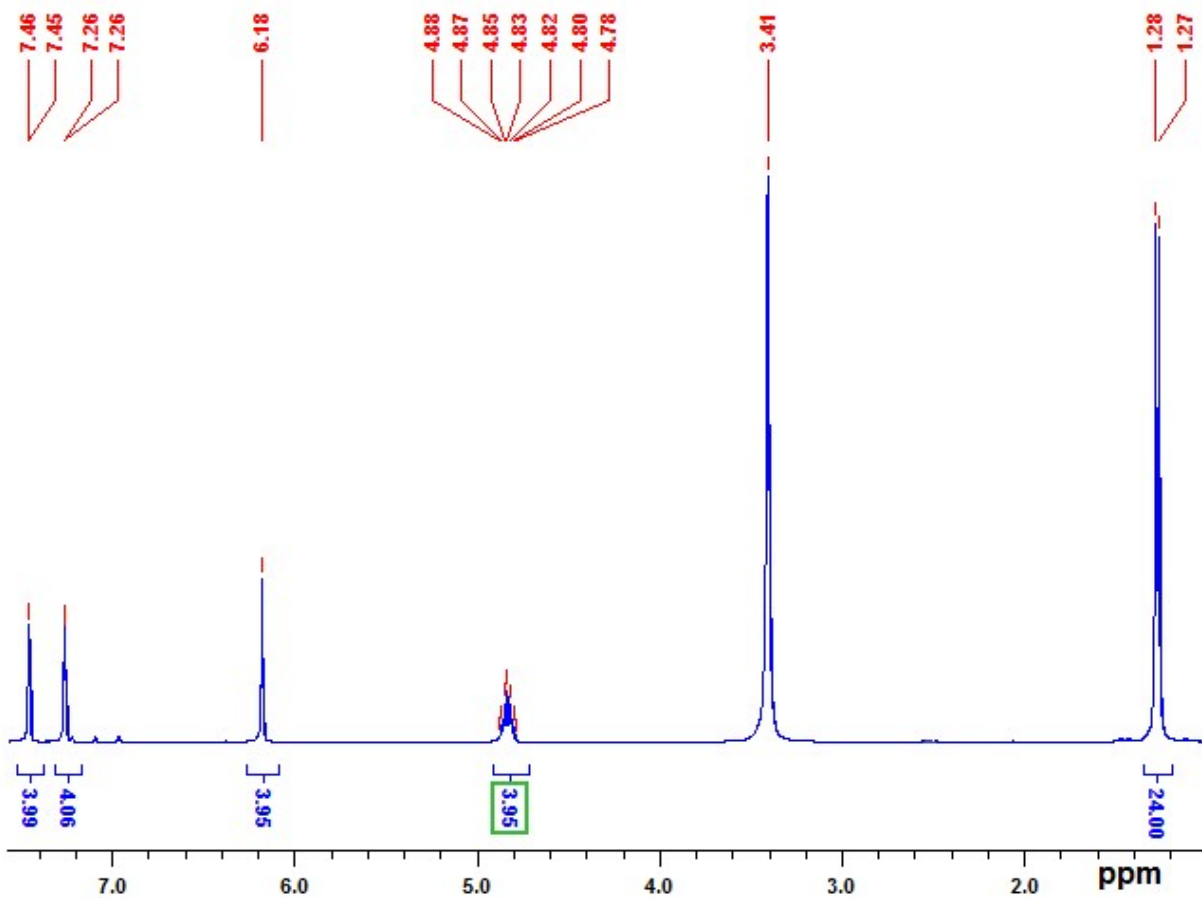

Fig. S10. <sup>1</sup>H NMR spectrum of [(mbpit)<sub>2</sub>(OTf)<sub>2</sub>Bi](OTf) (3) in DMSO-d<sub>6</sub> at RT.

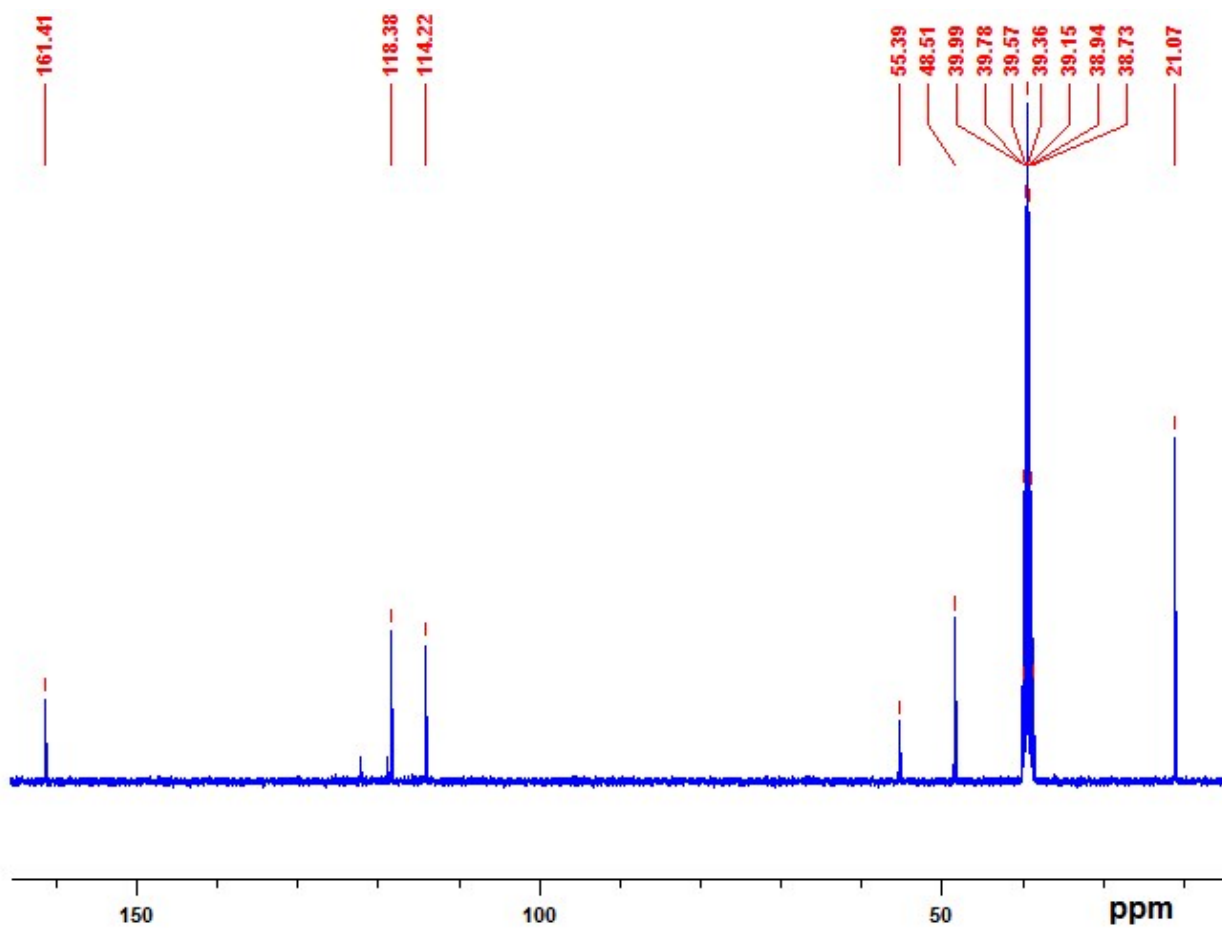

Fig. S11.  $^{13}\text{C}$  NMR spectrum of  $[(\text{mbpit})_2(\text{OTf})_2\text{Bi}](\text{OTf})$  (3) in  $\text{DMSO-d}_6$  at RT.

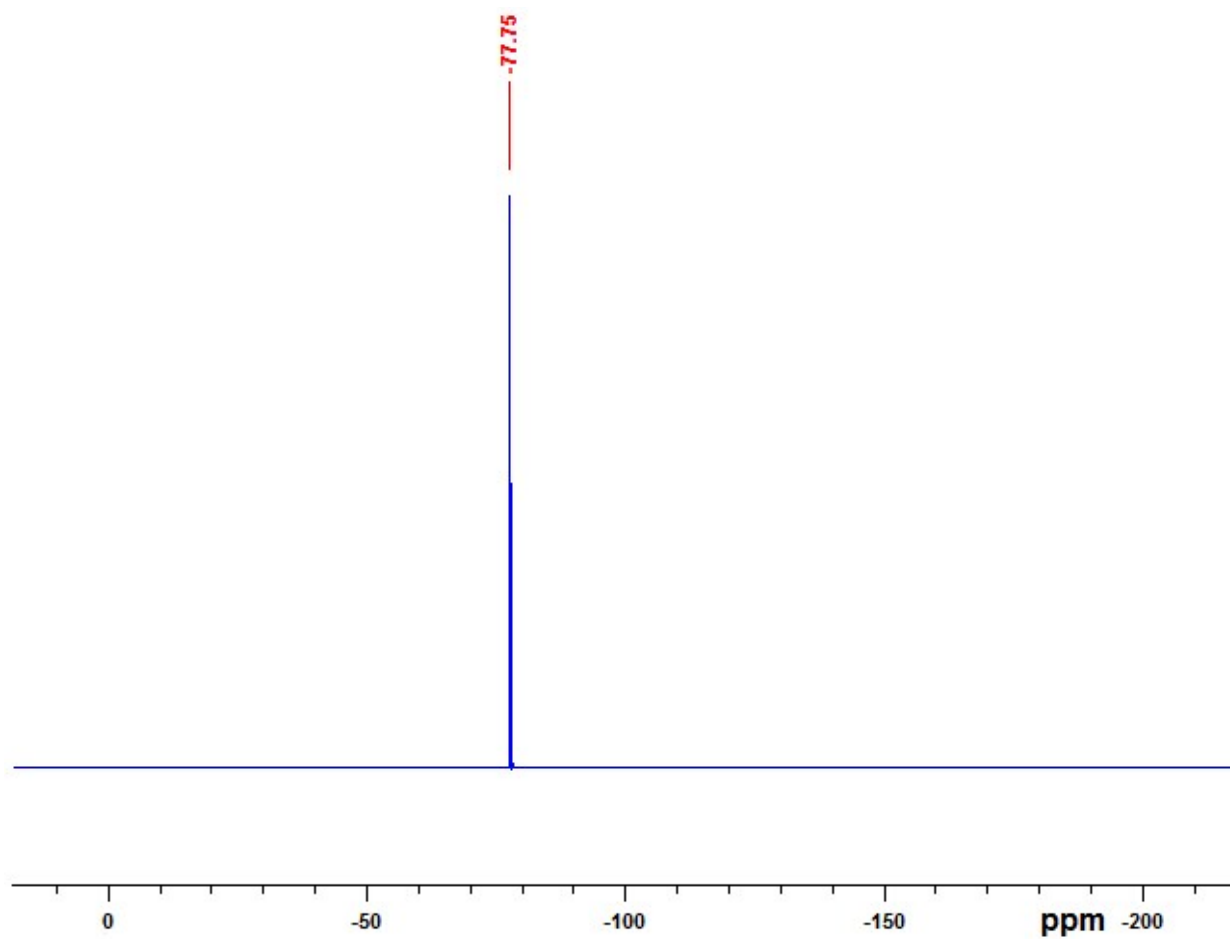

**Fig. S12.**  $^{19}\text{F}$  NMR spectrum of  $[(\text{mbpit})_2(\text{OTf})_2\text{Bi}](\text{OTf})$  (**3**) in  $\text{DMSO-d}_6$  at RT.

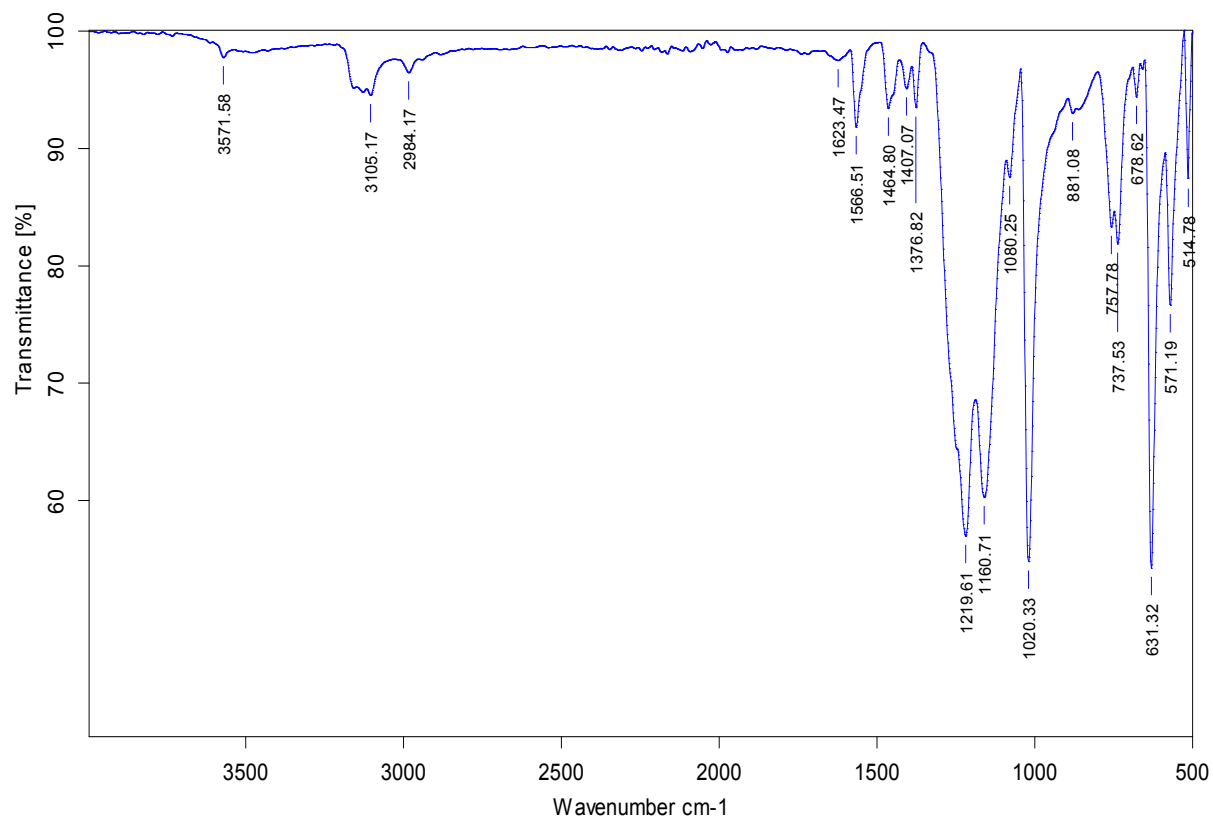

**Fig. S13.** Neat FT-IR spectrum of  $[(mbpis)_2(OTf)_2Bi](OTf)$  (4).

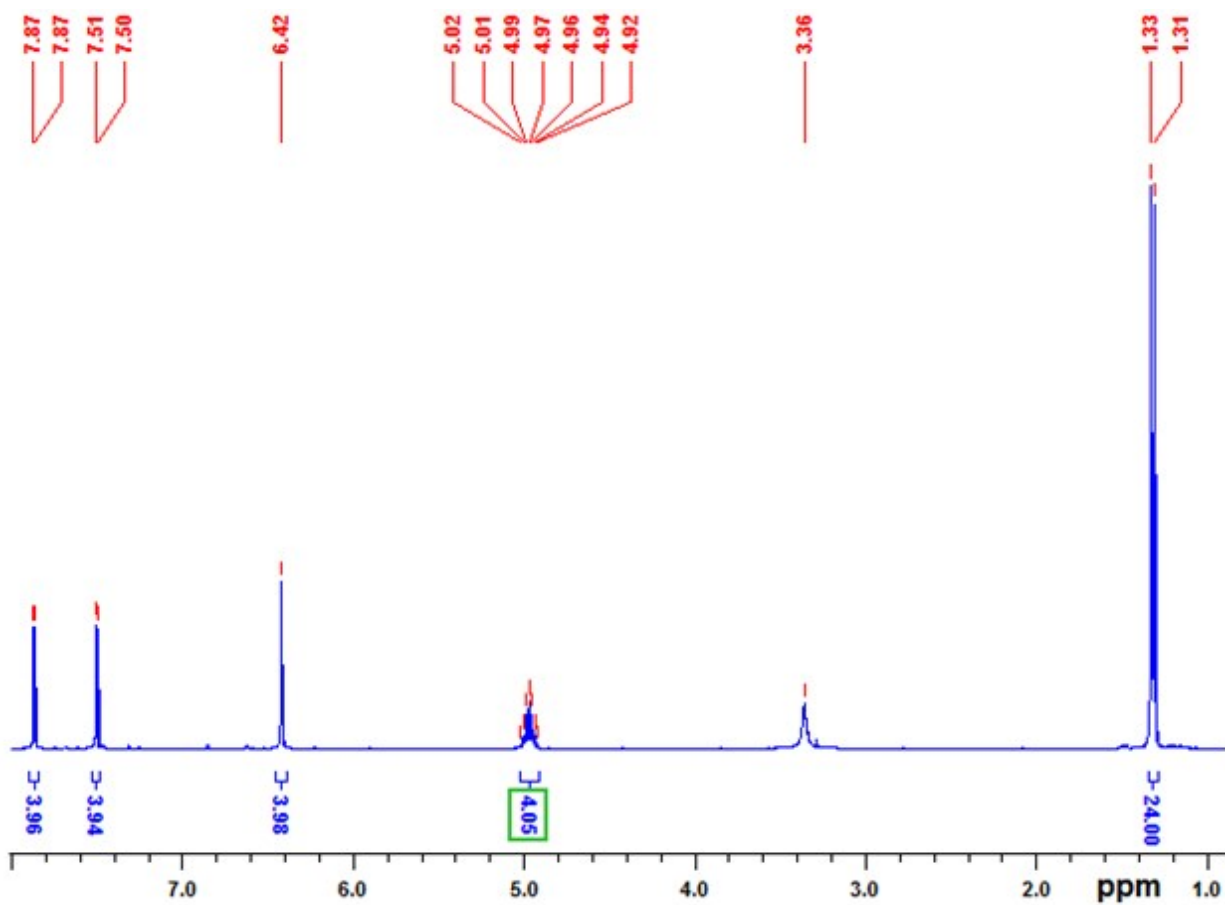

Fig. S14.  $^1\text{H}$  NMR spectrum of  $[(\text{mbpis})_2(\text{OTf})_2\text{Bi}](\text{OTf})$  (4) in  $\text{DMSO-d}_6$  at RT.

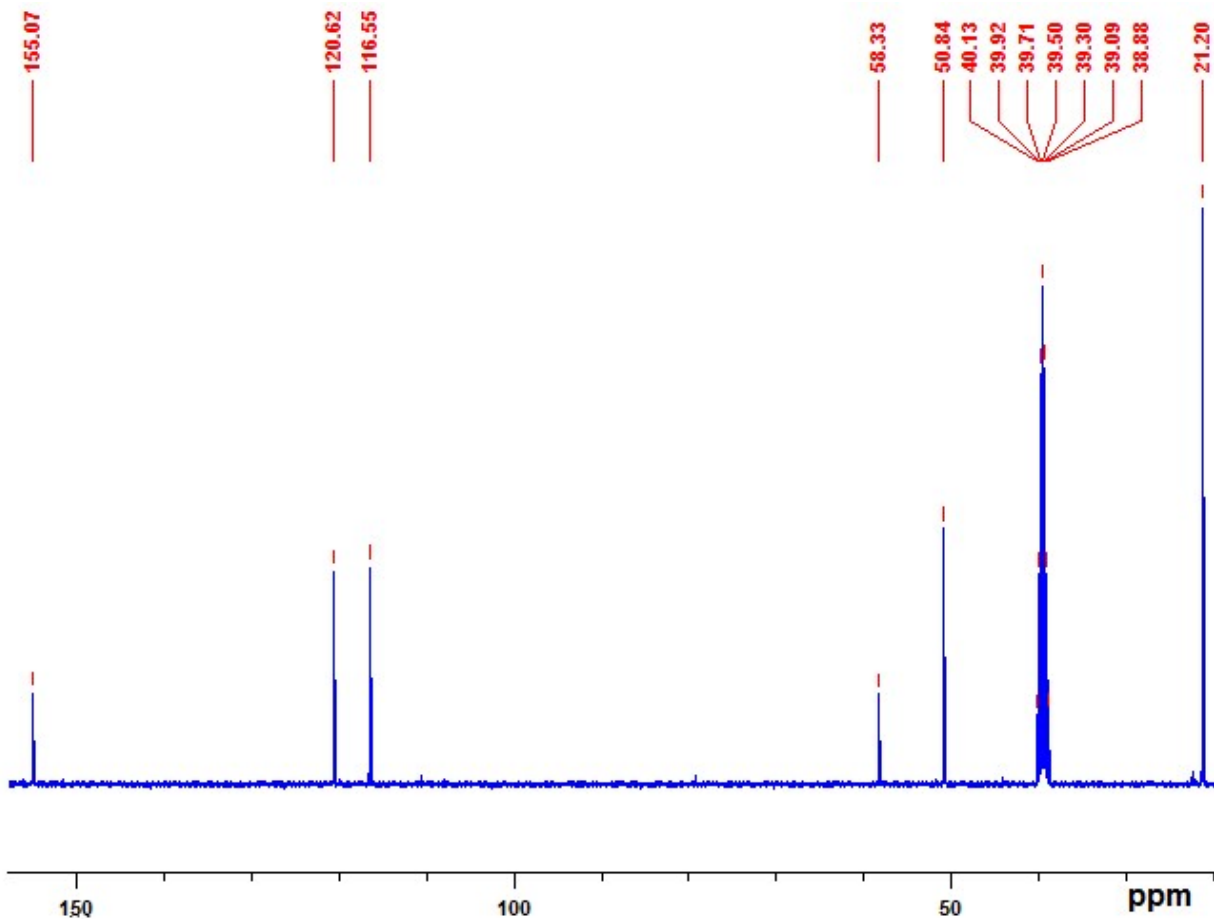

Fig. S15.  $^{13}\text{C}$  NMR spectrum of  $[(\text{mbpis})_2(\text{OTf})_2\text{Bi}](\text{OTf})$  (4) in  $\text{DMSO-d}_6$  at RT.

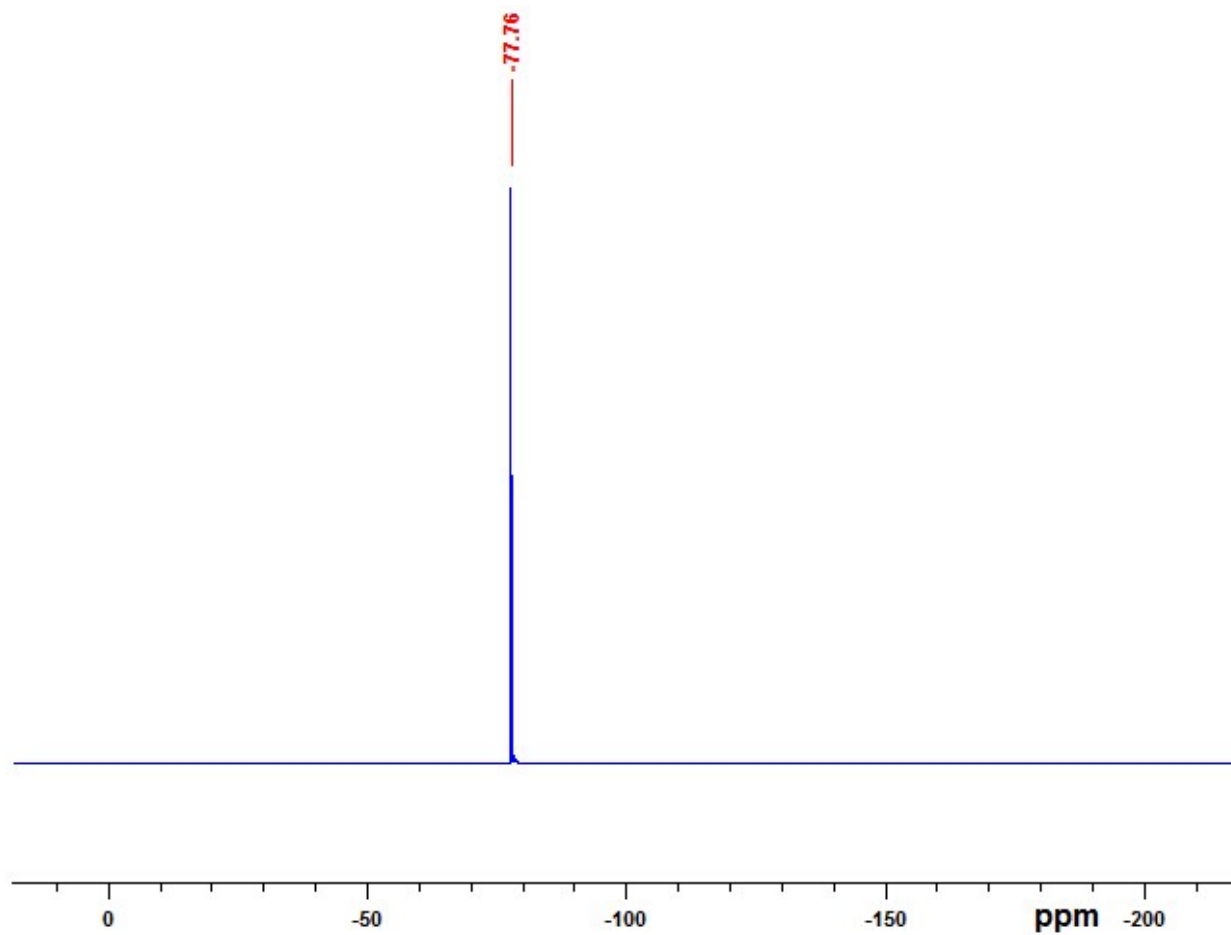

**Fig. S16.**  $^{19}\text{F}$  NMR spectrum of  $[(\text{mbpis})_2(\text{OTf})_2\text{Bi}](\text{OTf})$  (**4**) in  $\text{DMSO-d}_6$  at RT.



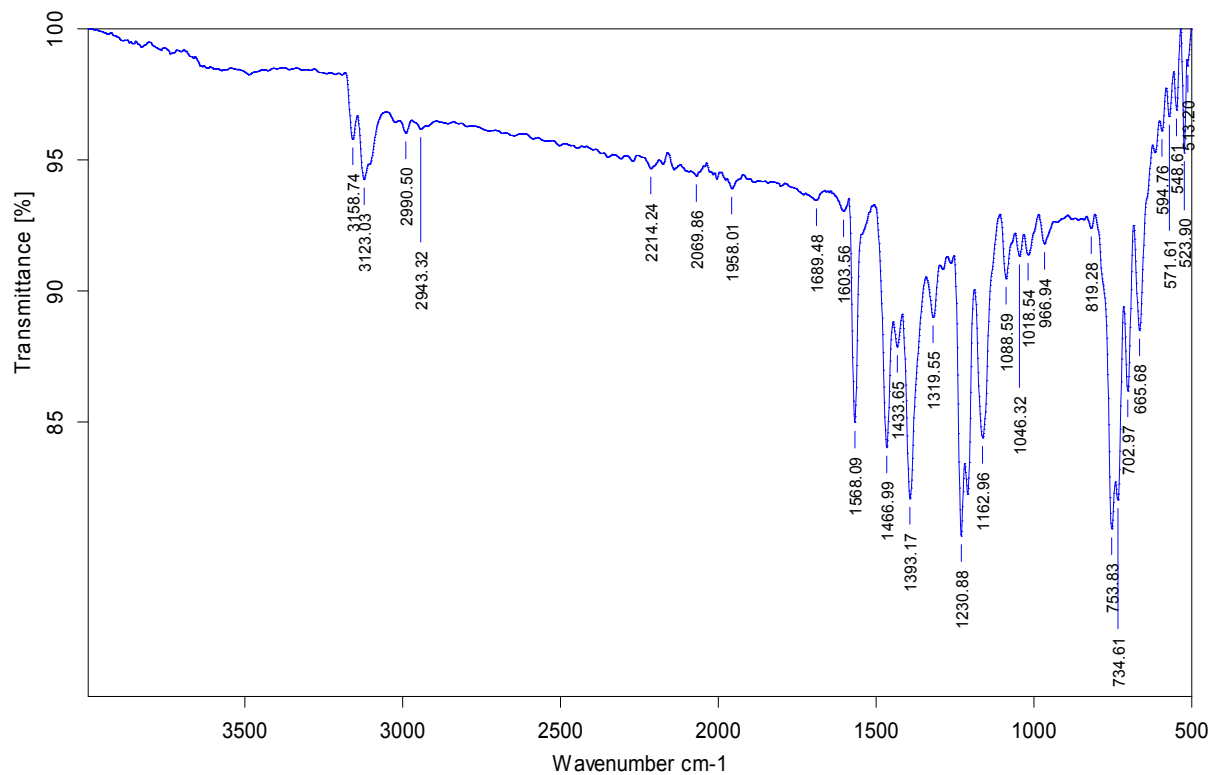

**Fig. S17.** Neat FT-IR spectrum of  $[(mbit)_2BiCl_2][(mbit)BiCl_4]$  (5).

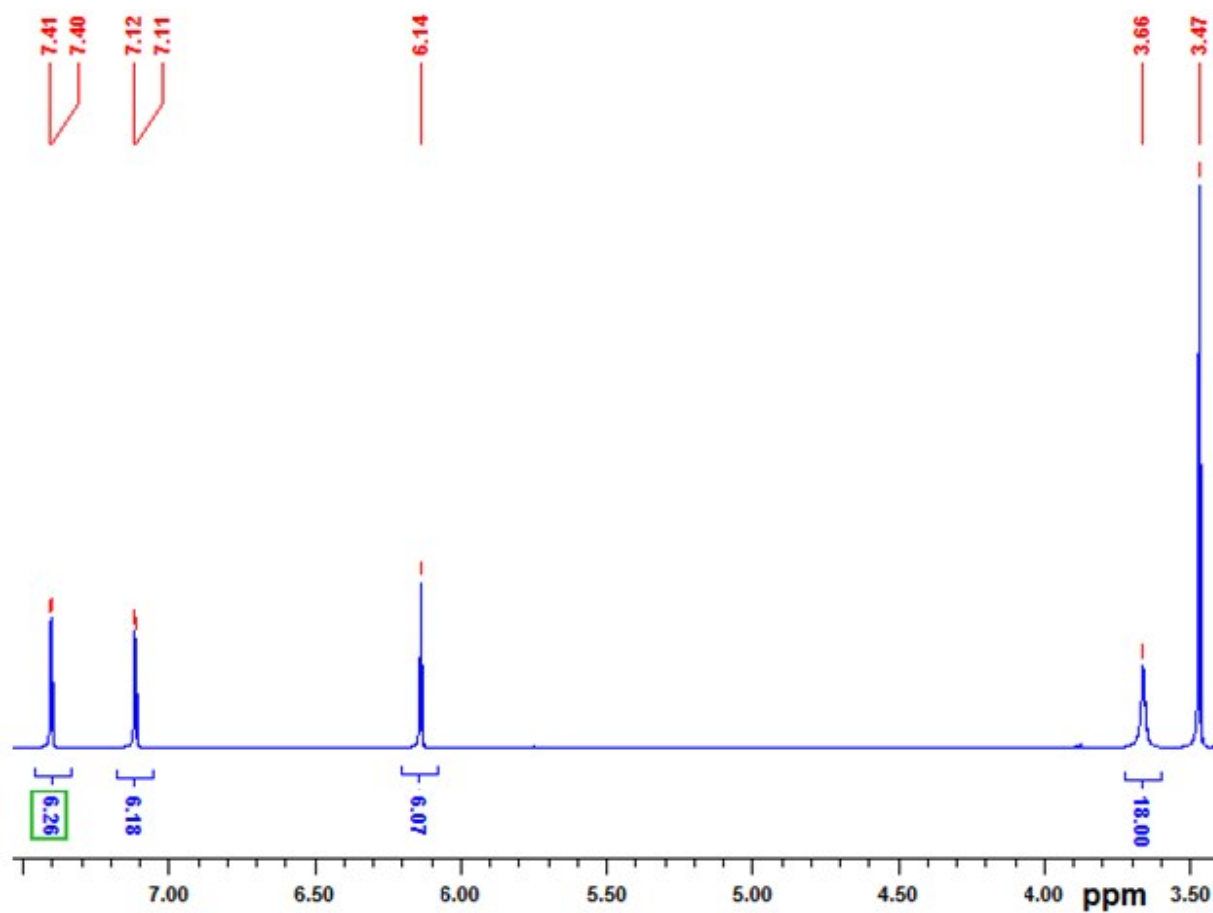

Fig. S18.  $^1\text{H}$  NMR spectrum of  $[(\text{mbit})_2\text{BiCl}_2][(\text{mbit})\text{BiCl}_4]$  (5) in  $\text{DMSO-d}_6$  at RT.

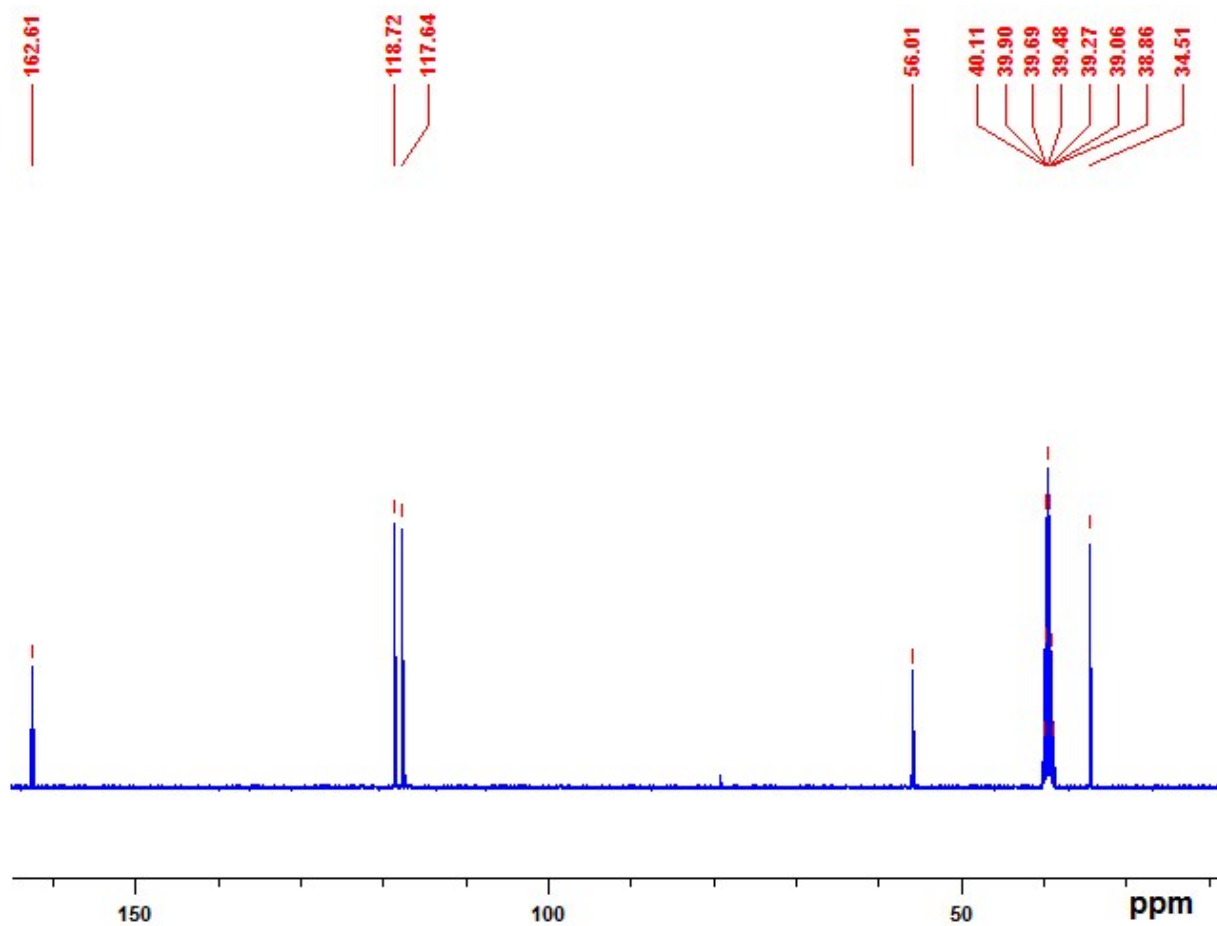

Fig. S19.  $^{13}\text{C}$  NMR spectrum of  $[(\text{mbit})_2\text{BiCl}_2][(\text{mbit})\text{BiCl}_4]$  (5) in  $\text{DMSO-d}_6$  at RT.

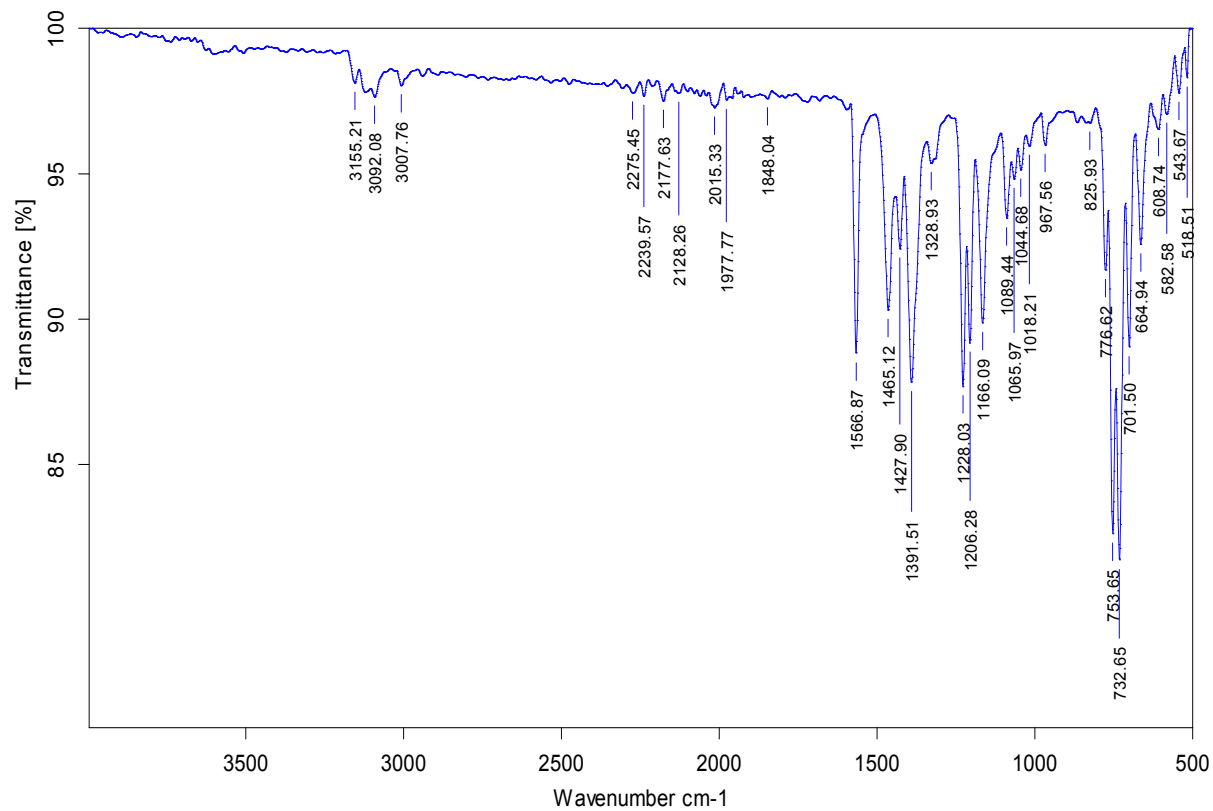

Fig. S20. Neat FT-IR spectrum of  $[(mbit)Bi(Br)_2(\mu_2-Br)]_2$  (6).

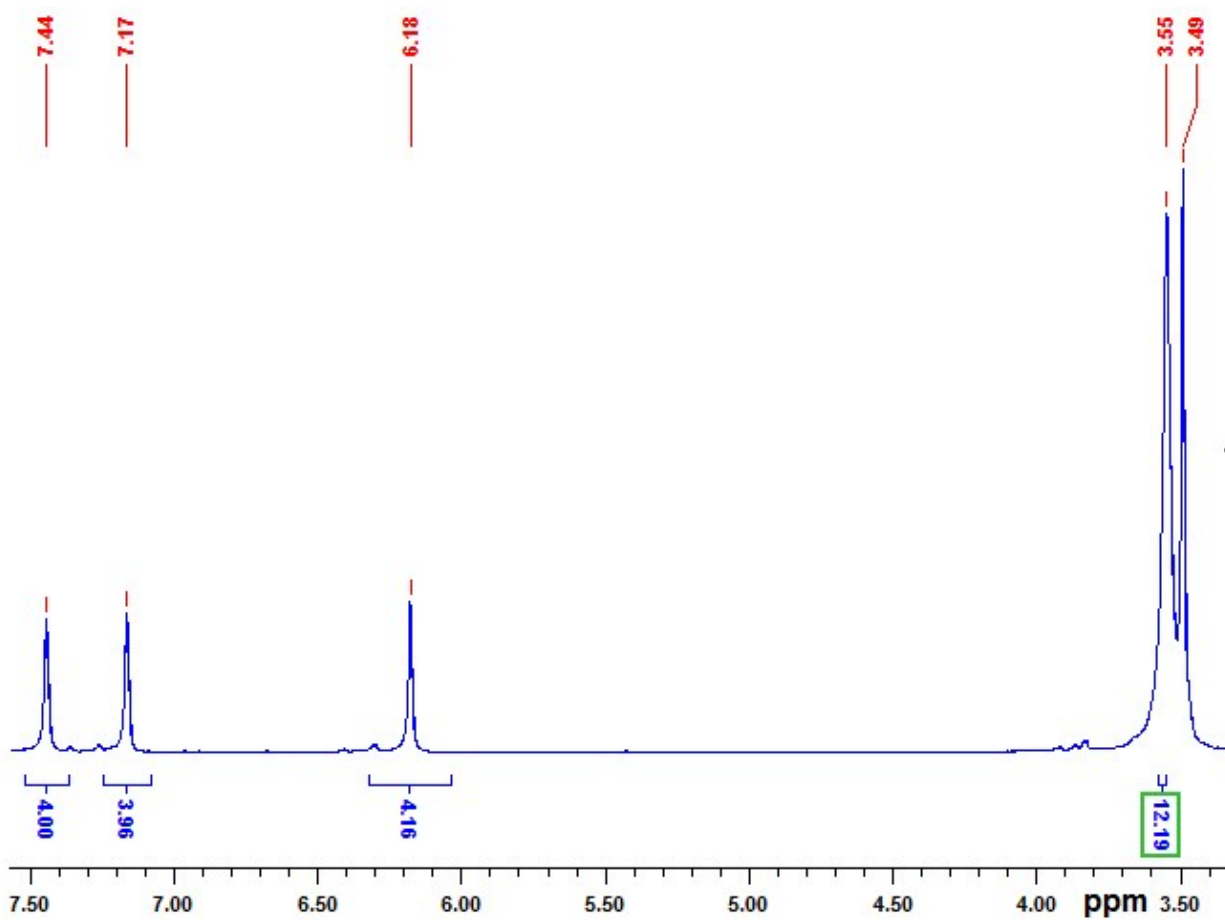

Fig. S21.  $^1\text{H}$  NMR spectrum of  $[(\text{mbit})\text{Bi}(\text{Br})_2(\mu_2\text{-Br})]_2$  (6) in  $\text{DMSO-d}_6$  at RT.

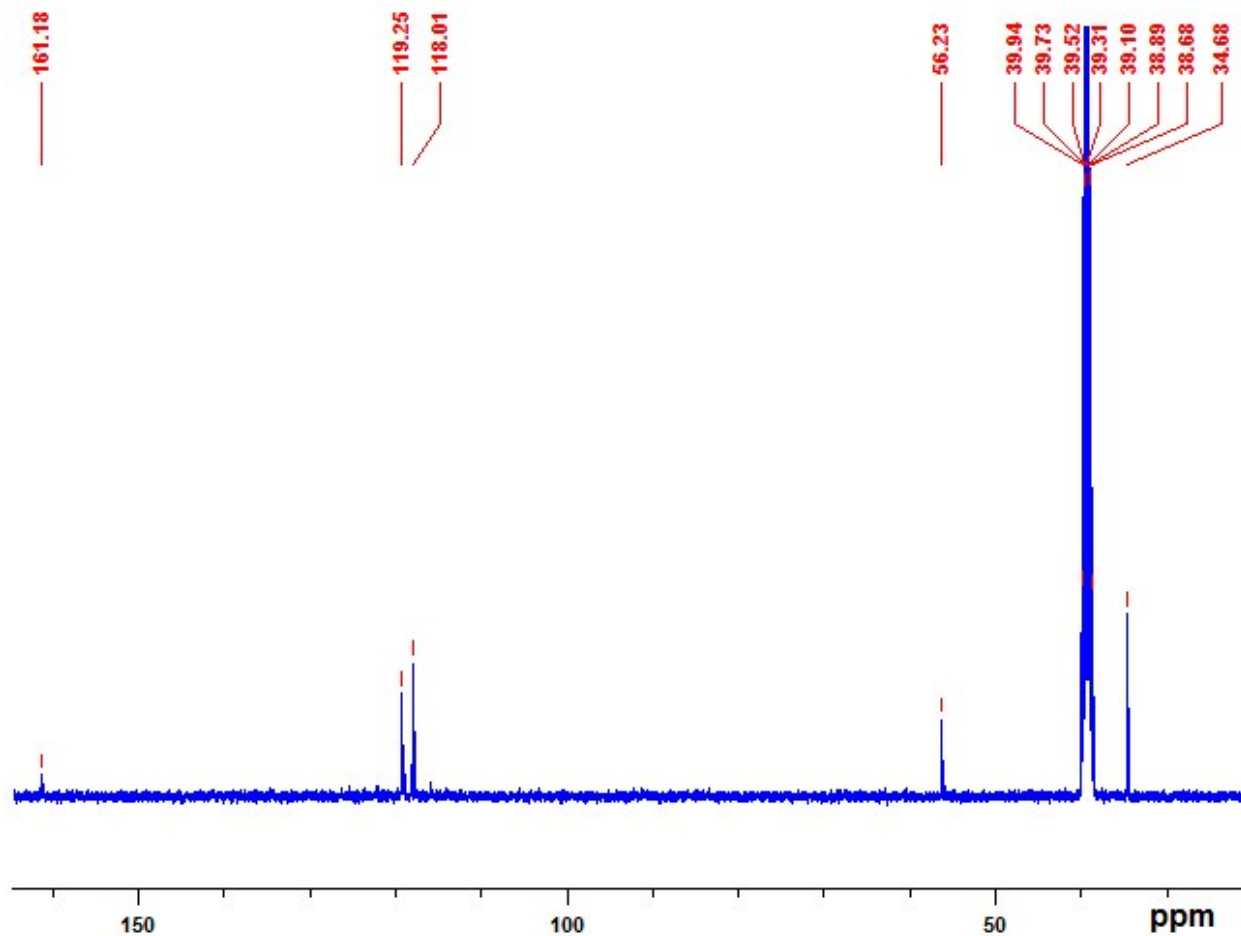

Fig. S22.  $^{13}\text{C}$  NMR spectrum of  $[(\text{mbit})\text{Bi}(\text{Br})_2(\mu_2\text{-Br})]_2$  (6) in  $\text{DMSO-d}_6$  at RT.

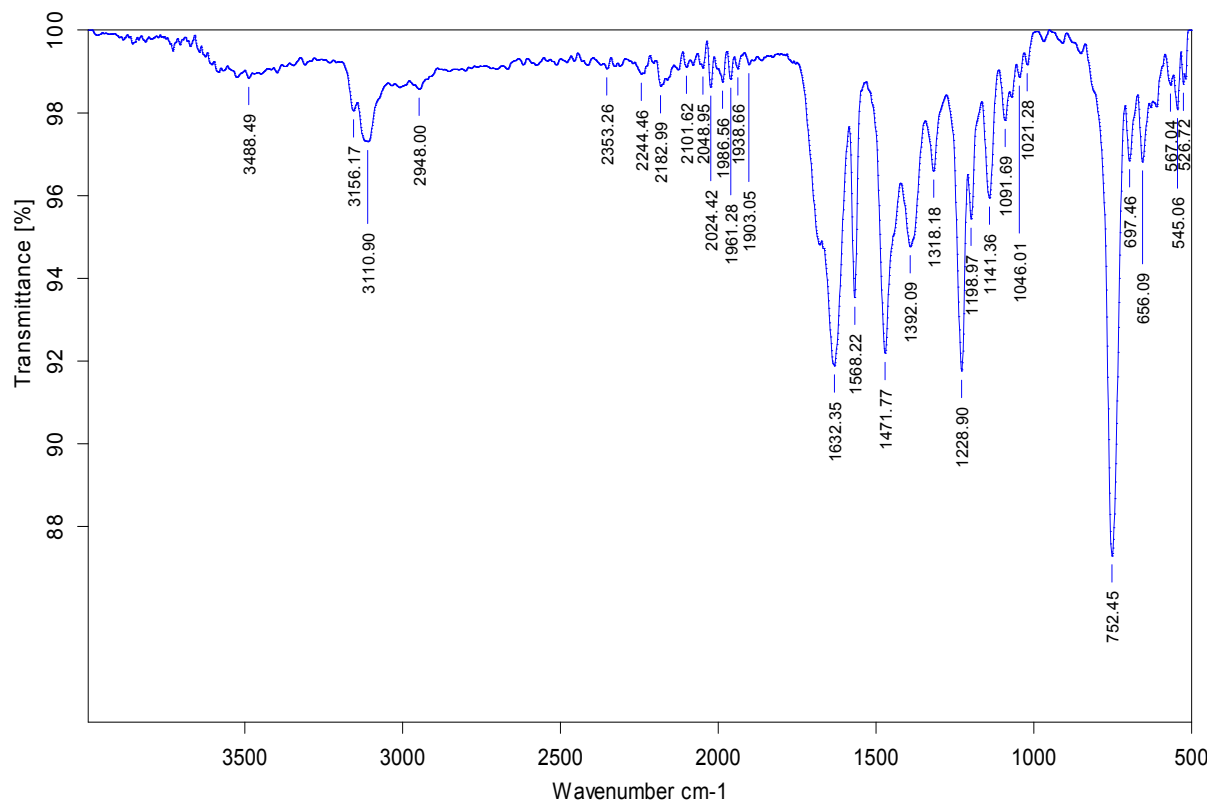

Fig. S23. Neat FT-IR spectrum of  $[(mbis)Bi(Cl)_2(\mu_2-Cl)]_2$  (7).

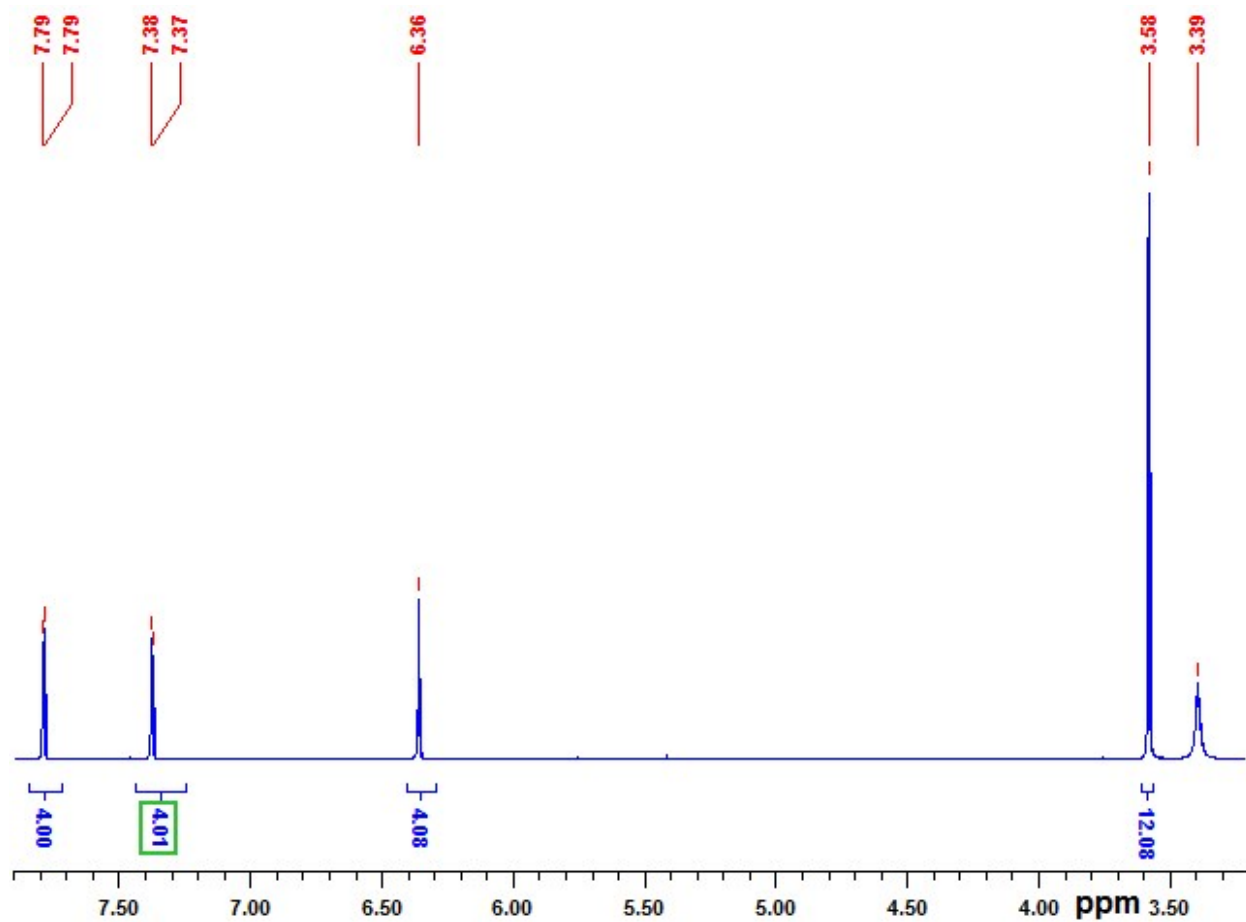

Fig. S24. <sup>1</sup>H NMR spectrum of [(mbis)Bi(Cl)<sub>2</sub>(μ<sub>2</sub>-Cl)]<sub>2</sub> (7) in DMSO-d<sub>6</sub> at RT.



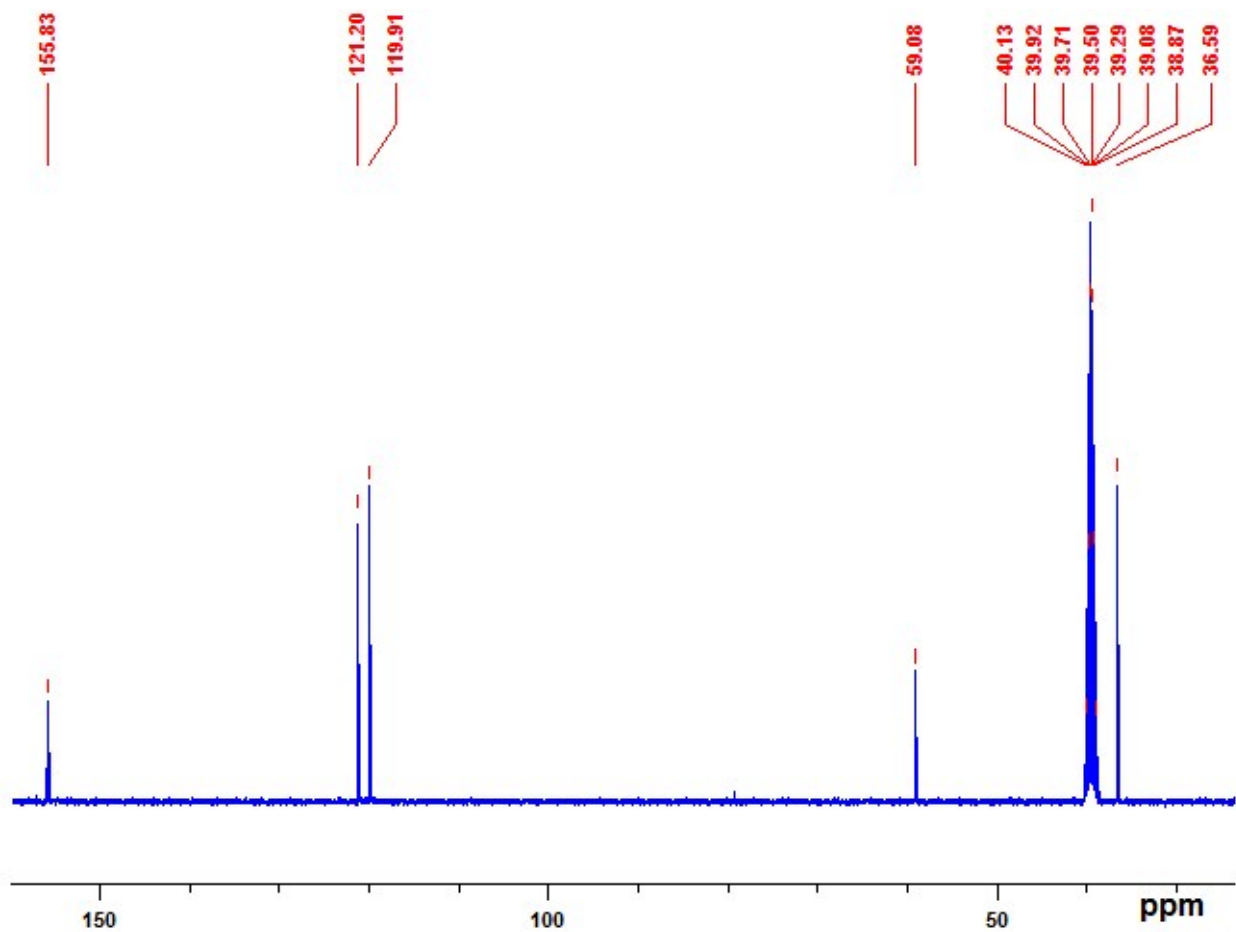

Fig. S25.  $^{13}\text{C}$  NMR spectrum of  $[(\text{mbis})\text{Bi}(\text{Cl})_2(\mu_2\text{-Cl})]_2$  (7) in  $\text{DMSO-d}_6$  at RT.

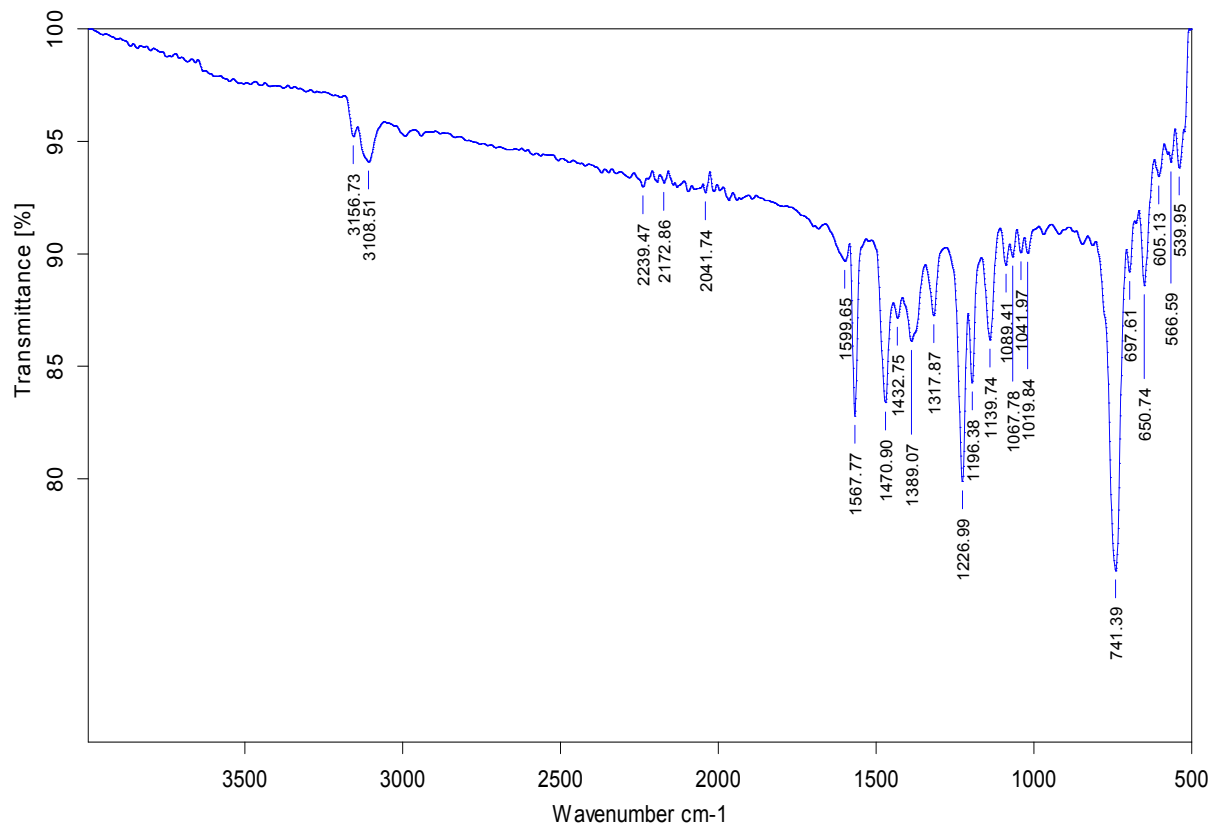

**Fig. S26.** Neat FT-IR spectrum of  $[(mbis)Bi(Br)_2(\mu_2-Br)]_2$  (**8**).

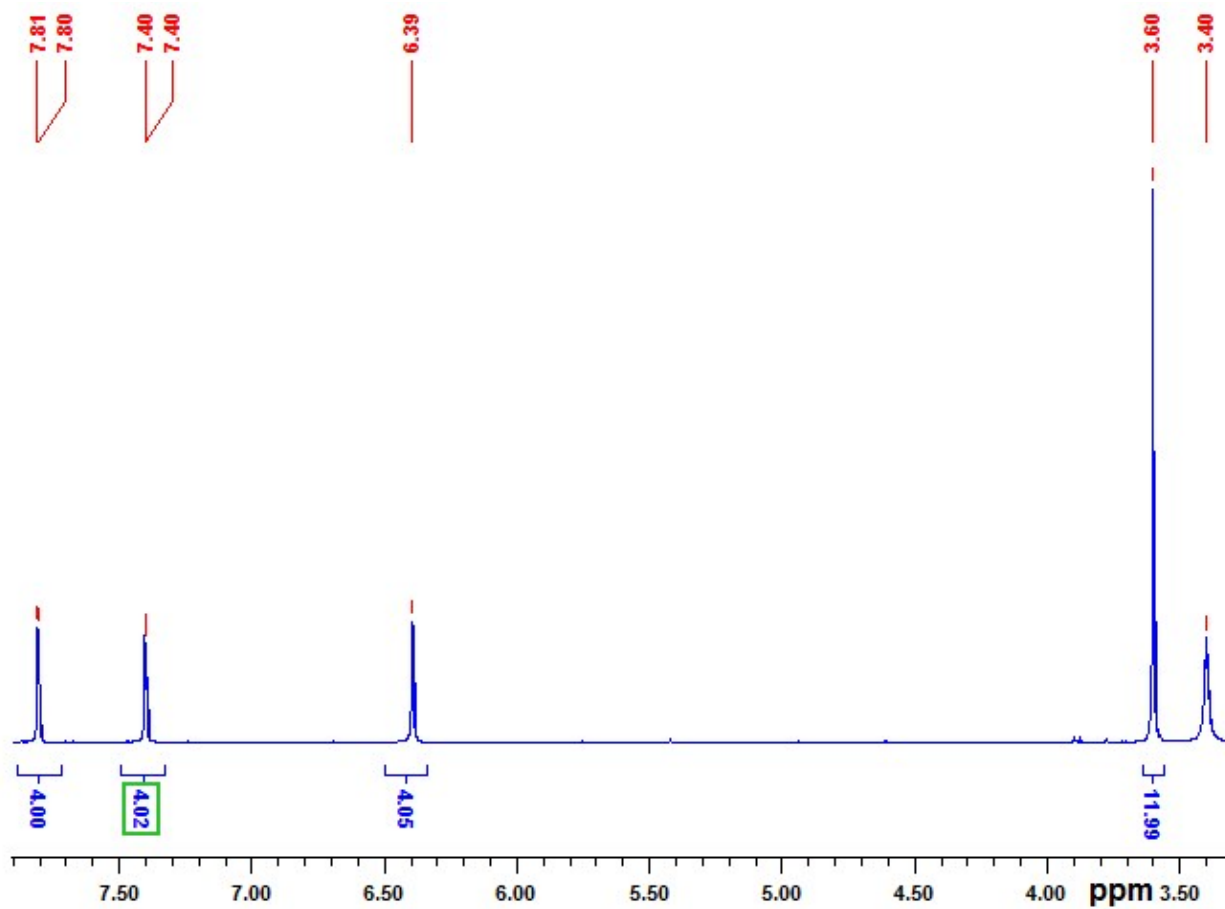

Fig. S27.  $^1\text{H}$  NMR spectrum of  $[(\text{mbis})\text{Bi}(\text{Br})_2(\mu_2\text{-Br})]_2$  (**8**) in  $\text{DMSO-d}_6$  at RT.

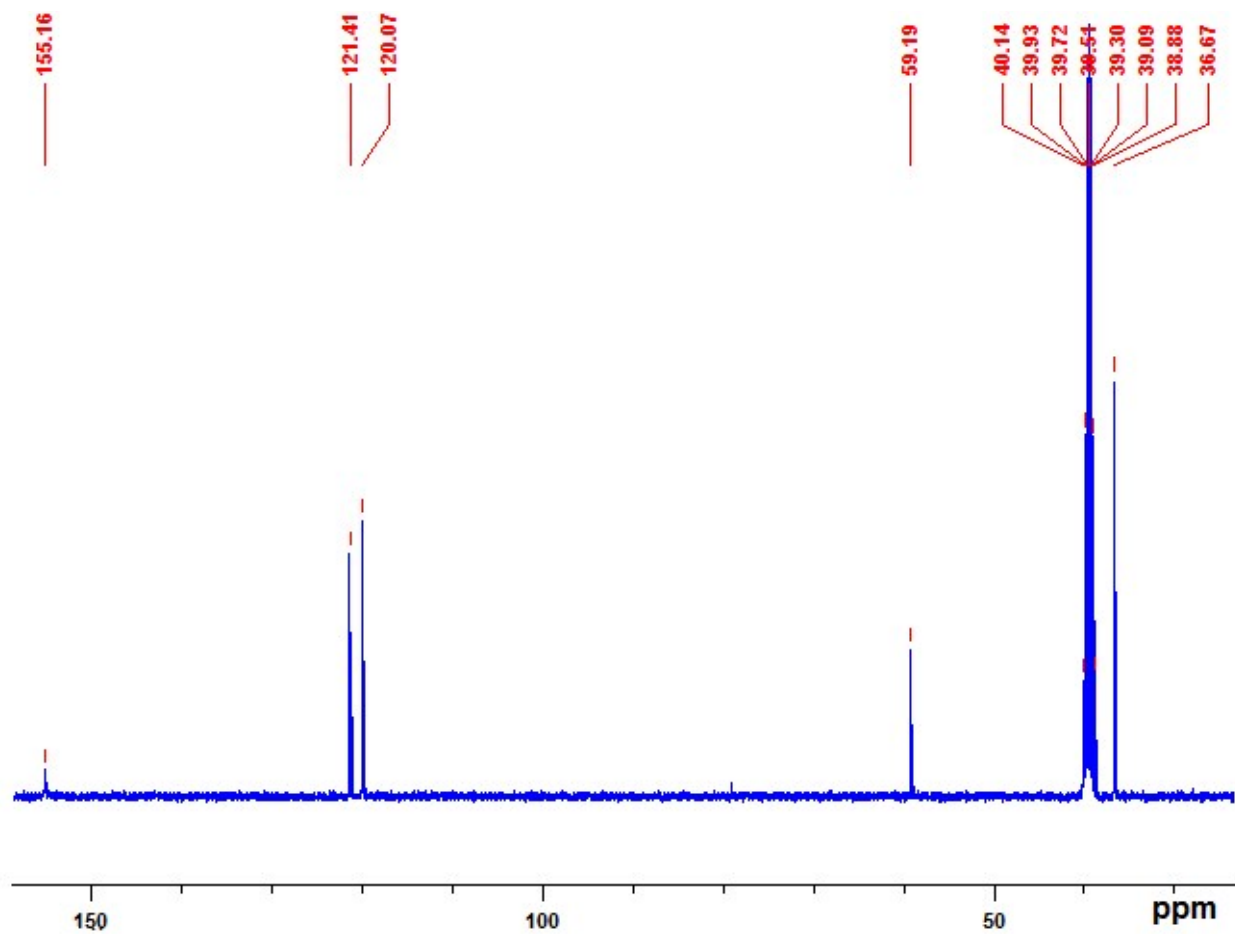

Fig. S28.  $^{13}\text{C}$  NMR spectrum of  $[(\text{mbis})\text{Bi}(\text{Br})_2(\mu_2\text{-Br})]_2$  (8) in  $\text{DMSO-d}_6$  at RT.

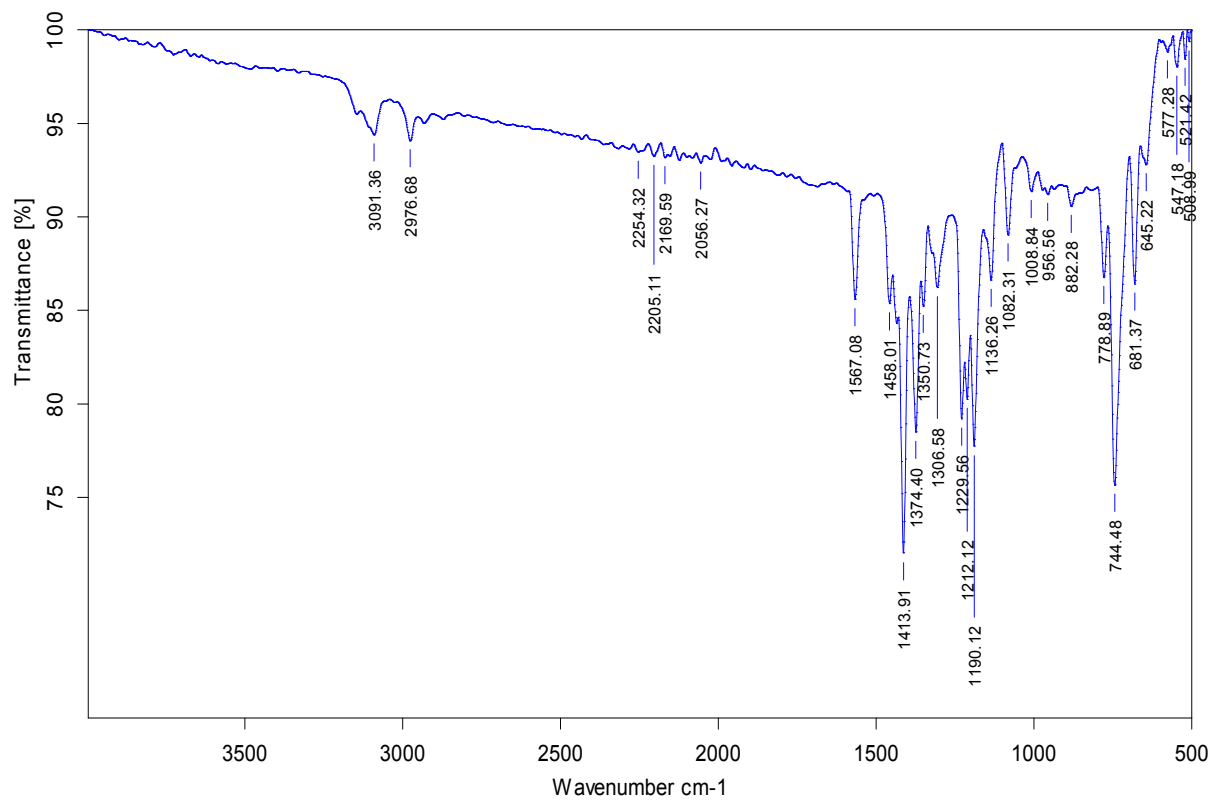

**Fig. S29.** Neat FT-IR spectrum of  $[(mbpit)Bi(Cl)_2(\mu_2-Cl)]_2 \cdot CH_3CN$  (9).

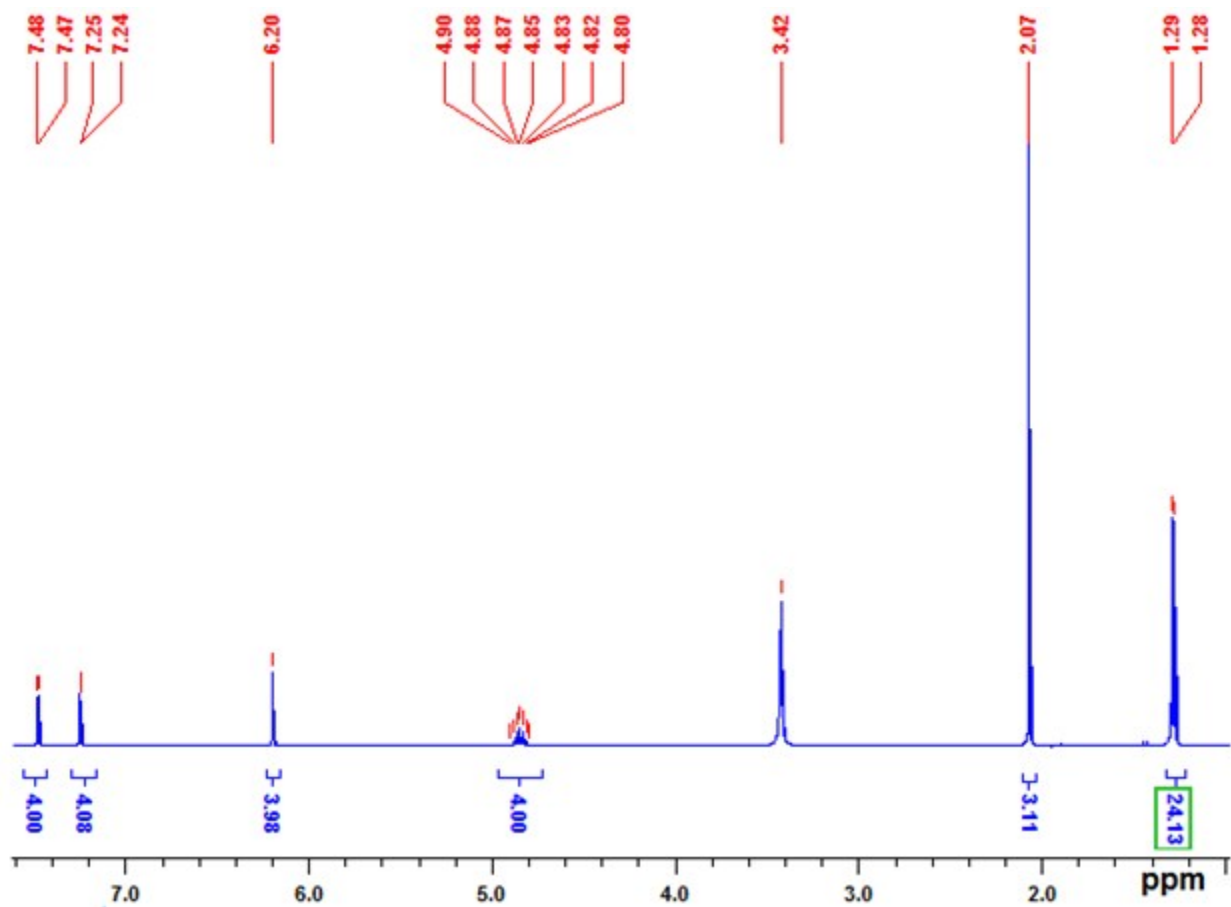

Fig. S30. <sup>1</sup>H NMR spectrum of [(mbpit)Bi(Cl)<sub>2</sub>(μ<sub>2</sub>-Cl)]<sub>2</sub>·CH<sub>3</sub>CN (9) in DMSO-d<sub>6</sub> at RT.

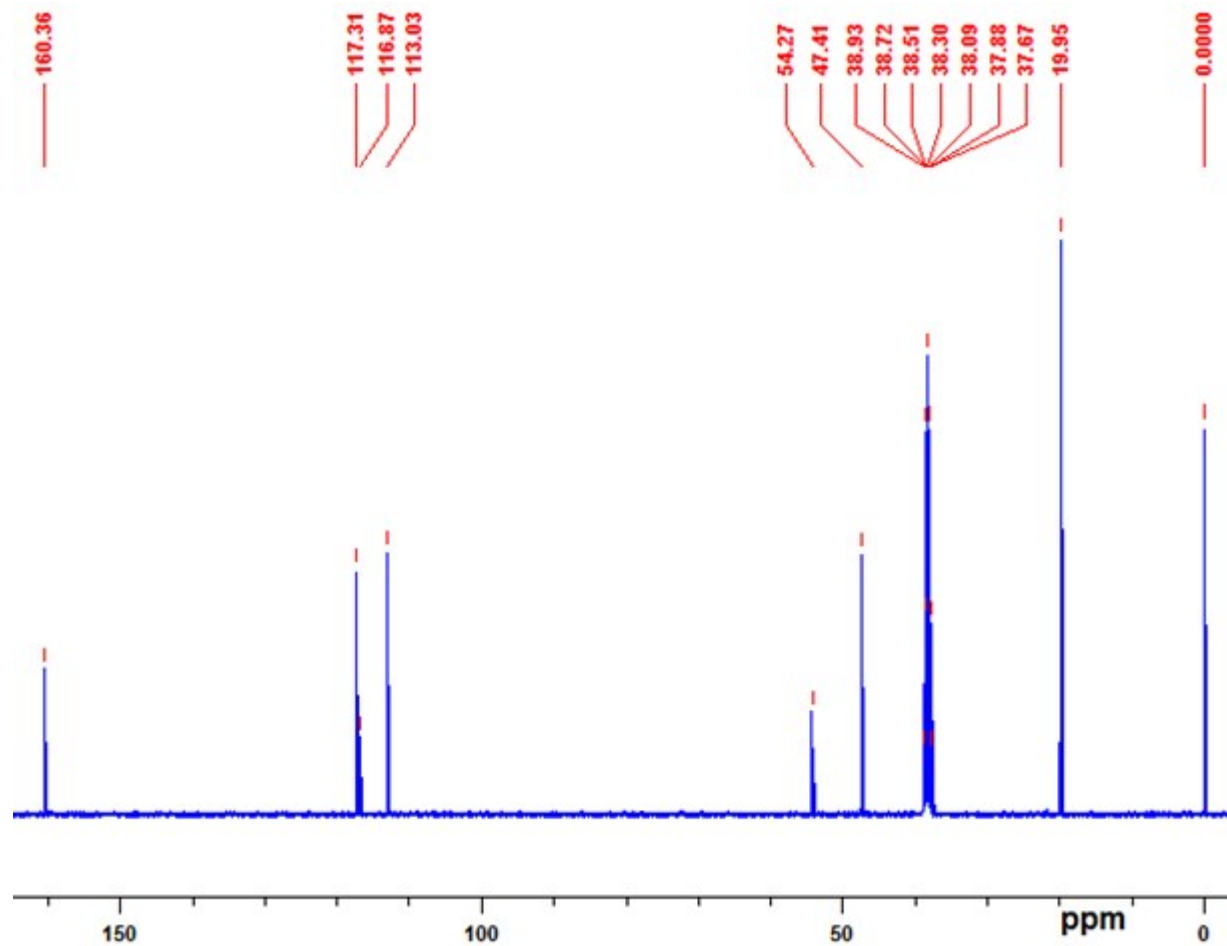

Fig. S31.  $^{13}\text{C}$  NMR spectrum of  $[(\text{mbpit})\text{Bi}(\text{Cl})_2(\mu_2\text{-Cl})]_2\cdot\text{CH}_3\text{CN}$  (**9**) in  $\text{DMSO-d}_6$  at RT.

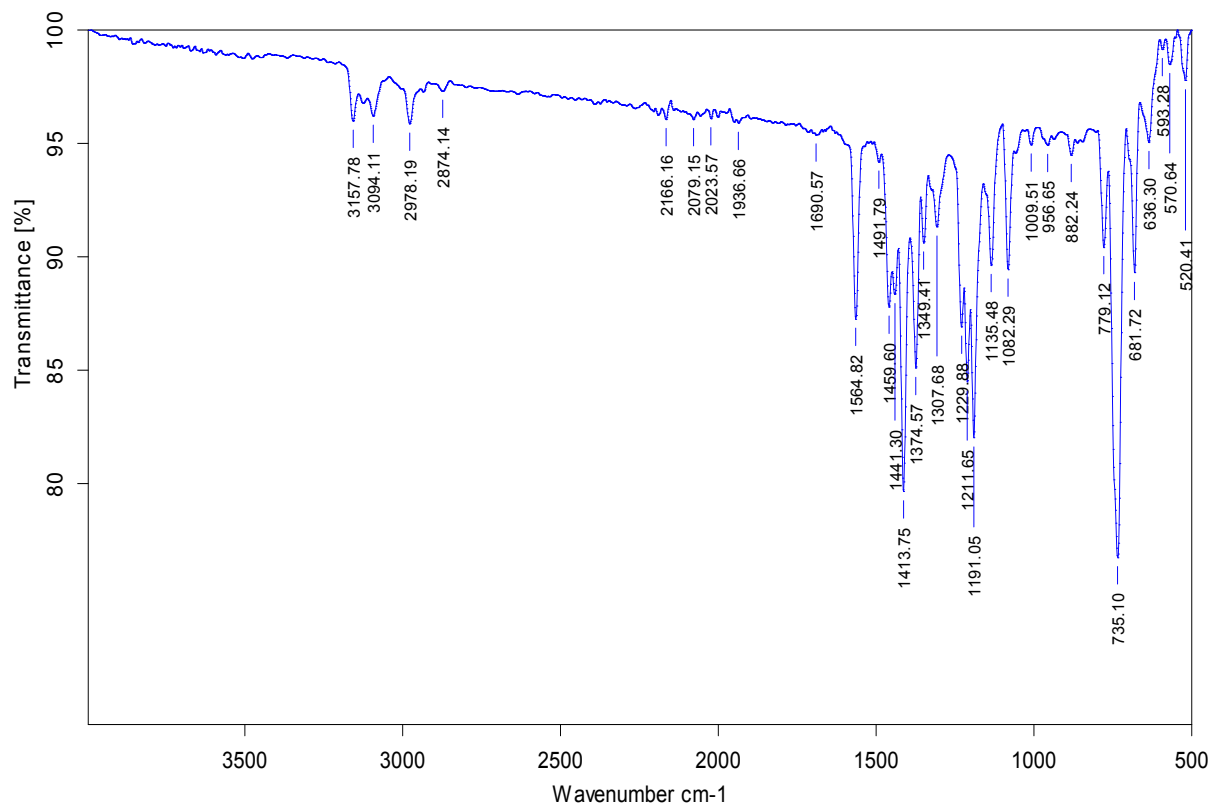

Fig. S32. Neat FT-IR spectrum of  $[(mbpit)Bi(Br)_2(\mu_2-Br)]_2 \cdot CH_3CN$  (10).



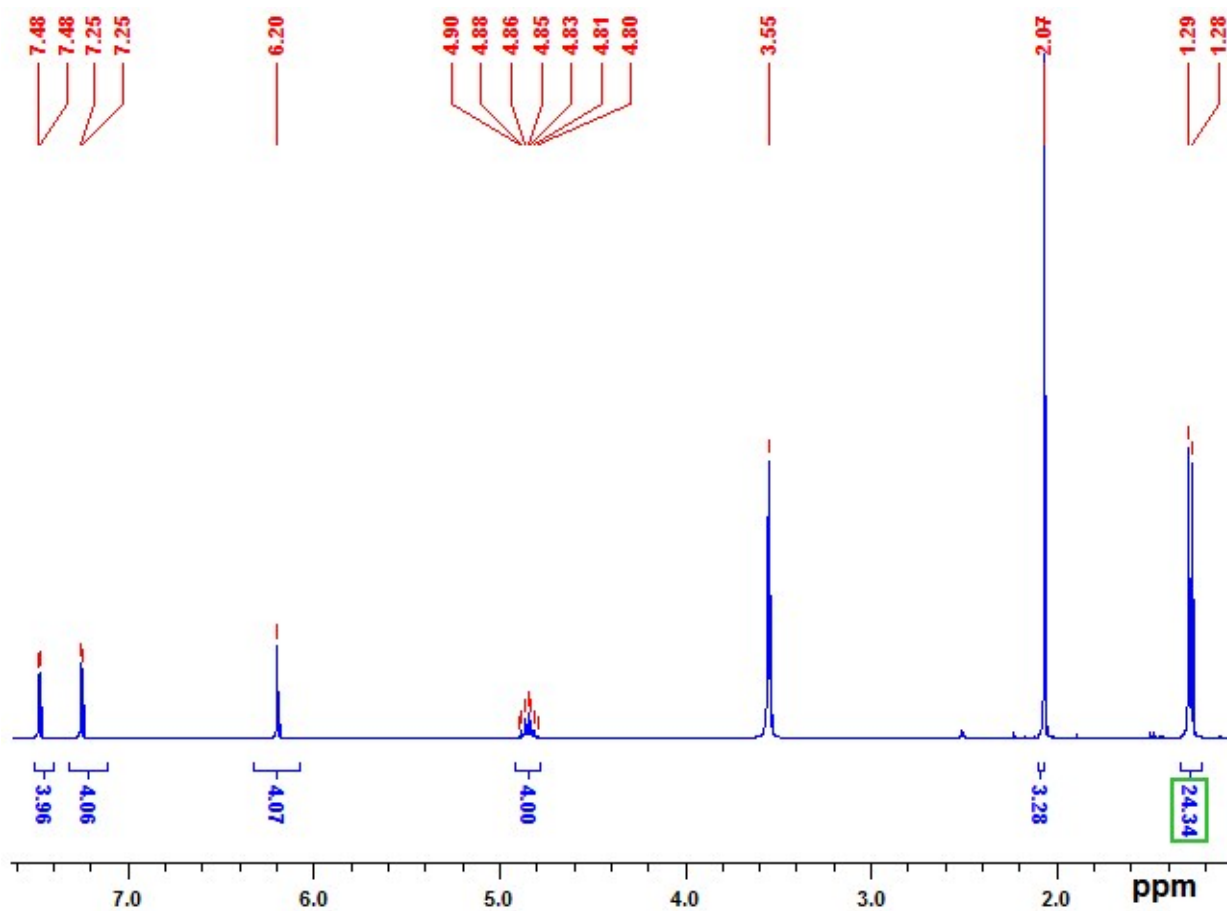

Fig. S33.  $^1\text{H}$  NMR spectrum of  $[(\text{mbpit})\text{Bi}(\text{Br})_2(\mu_2\text{-Br})]_2 \cdot \text{CH}_3\text{CN}$  (**10**) in  $\text{DMSO-d}_6$  at RT.

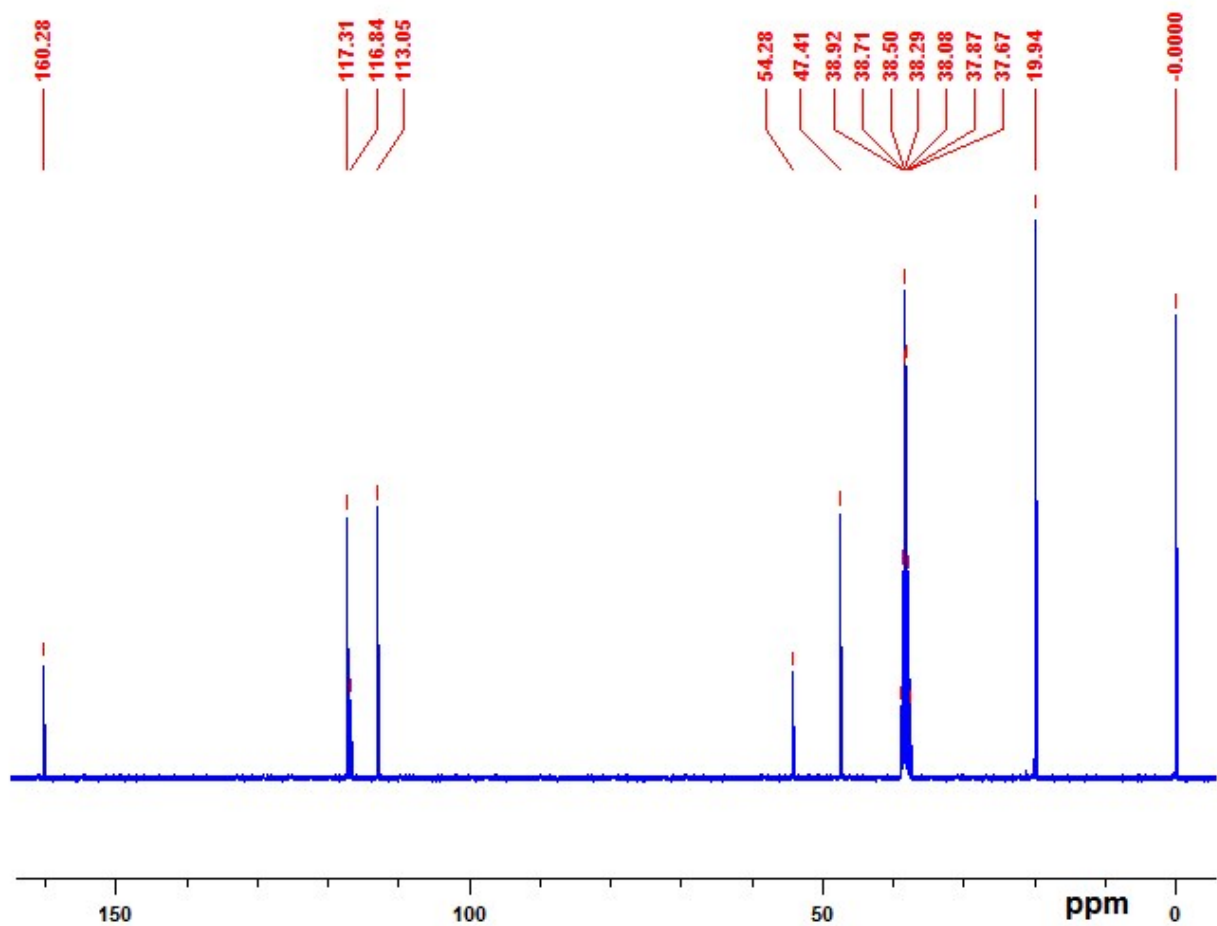

Fig. S34.  $^{13}\text{C}$  NMR spectrum of  $[(\text{mbpit})\text{Bi}(\text{Br})_2(\mu_2\text{-Br})]_2 \cdot \text{CH}_3\text{CN}$  (10) in  $\text{DMSO-d}_6$  at RT.

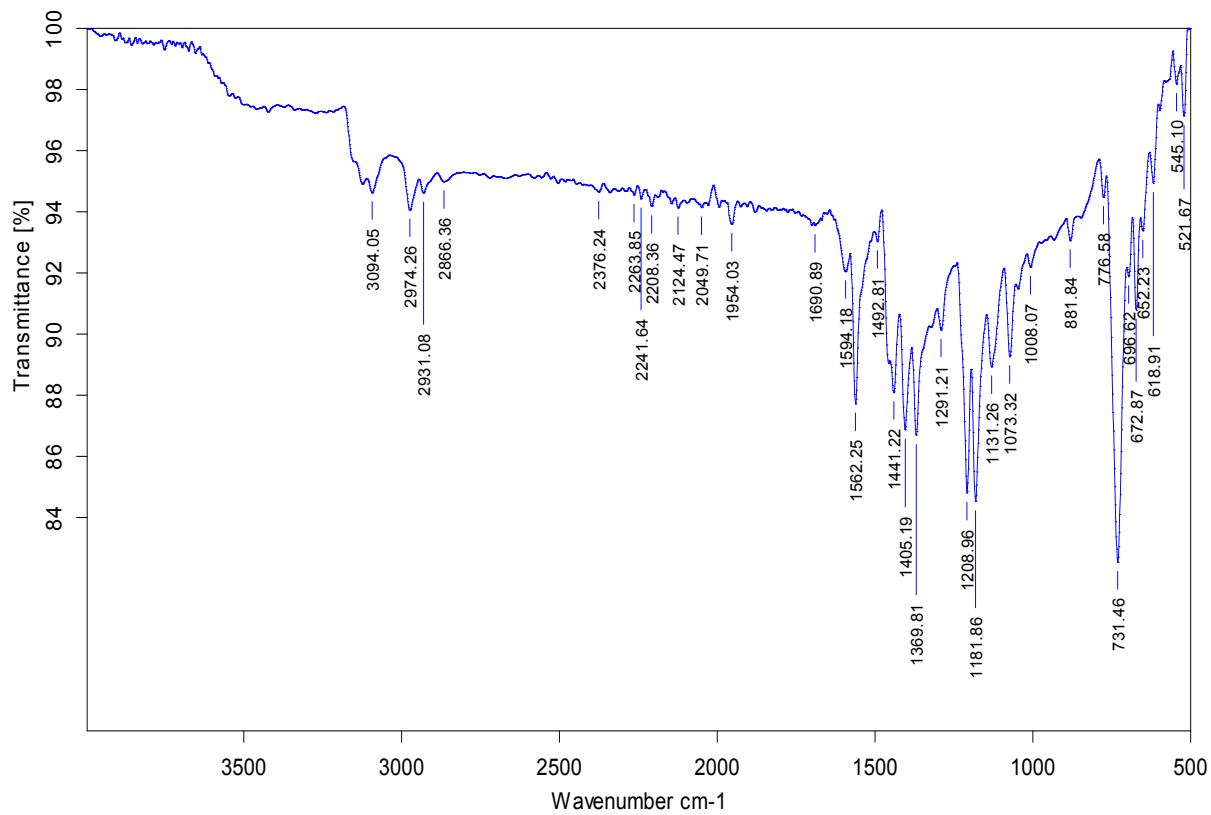

Fig. S35. Neat FT-IR spectrum of  $[(mbpis)Bi(Cl)_2(\mu_2-Cl)]_2 \cdot CH_3CN$  (11).

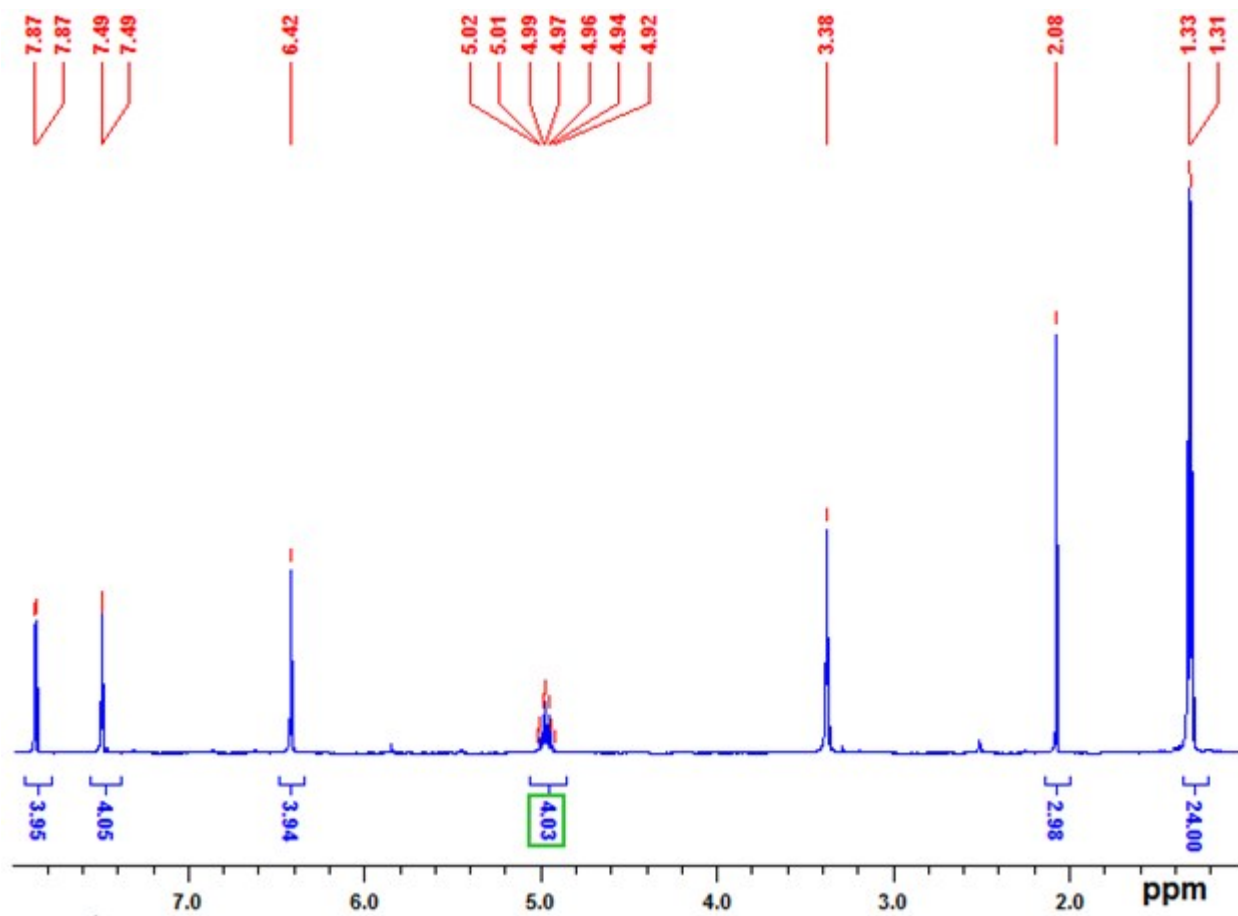

Fig. S36.  $^1\text{H}$  NMR spectrum of  $[(\text{mbpis})\text{Bi}(\text{Cl})_2(\mu_2\text{-Cl})]_2 \cdot \text{CH}_3\text{CN}$  (**11**) in  $\text{DMSO-d}_6$  at RT.

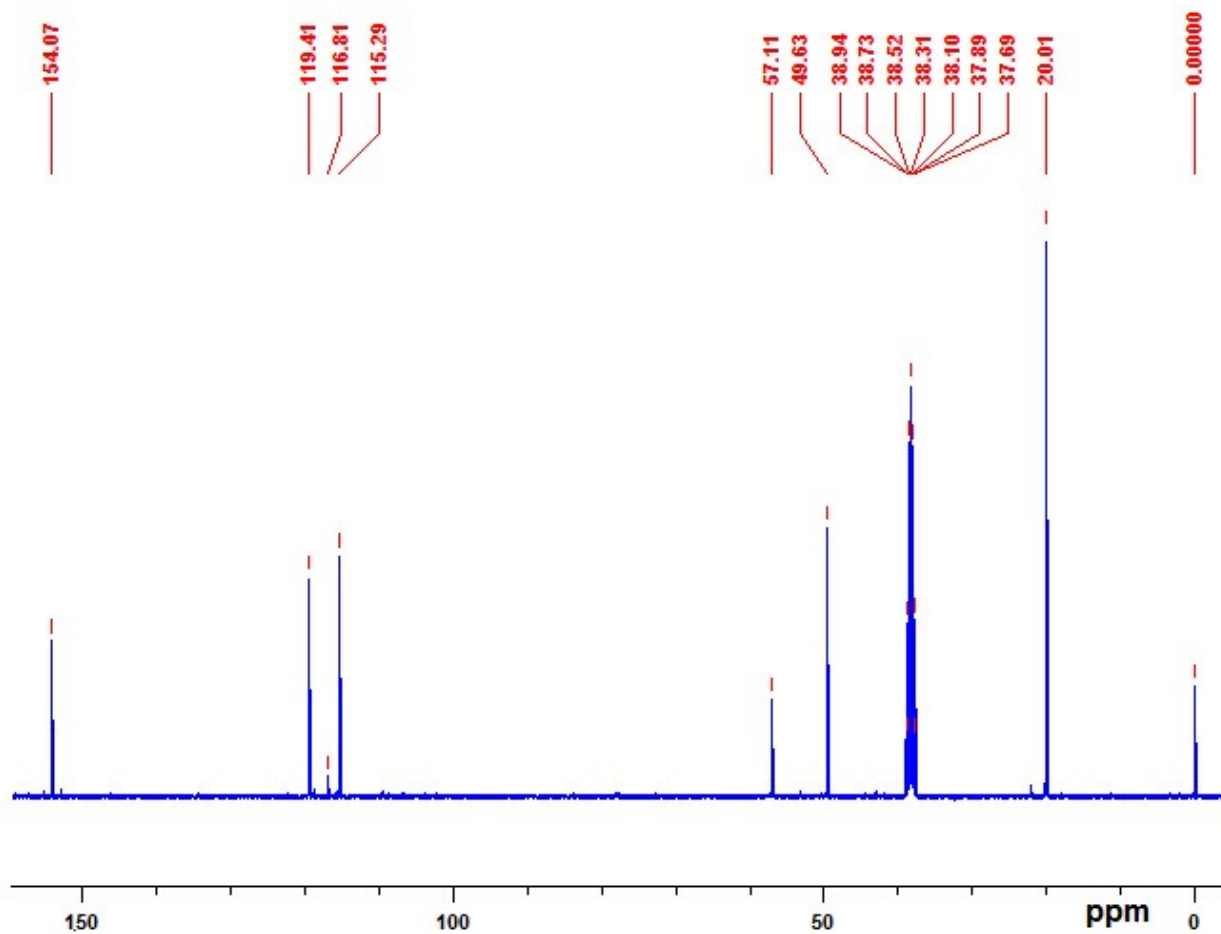

Fig. S37.  $^{13}\text{C}$  NMR spectrum of  $[(\text{mbpis})\text{Bi}(\text{Cl})_2(\mu_2\text{-Cl})]_2\cdot\text{CH}_3\text{CN}$  (**11**) in  $\text{DMSO-d}_6$  at RT.

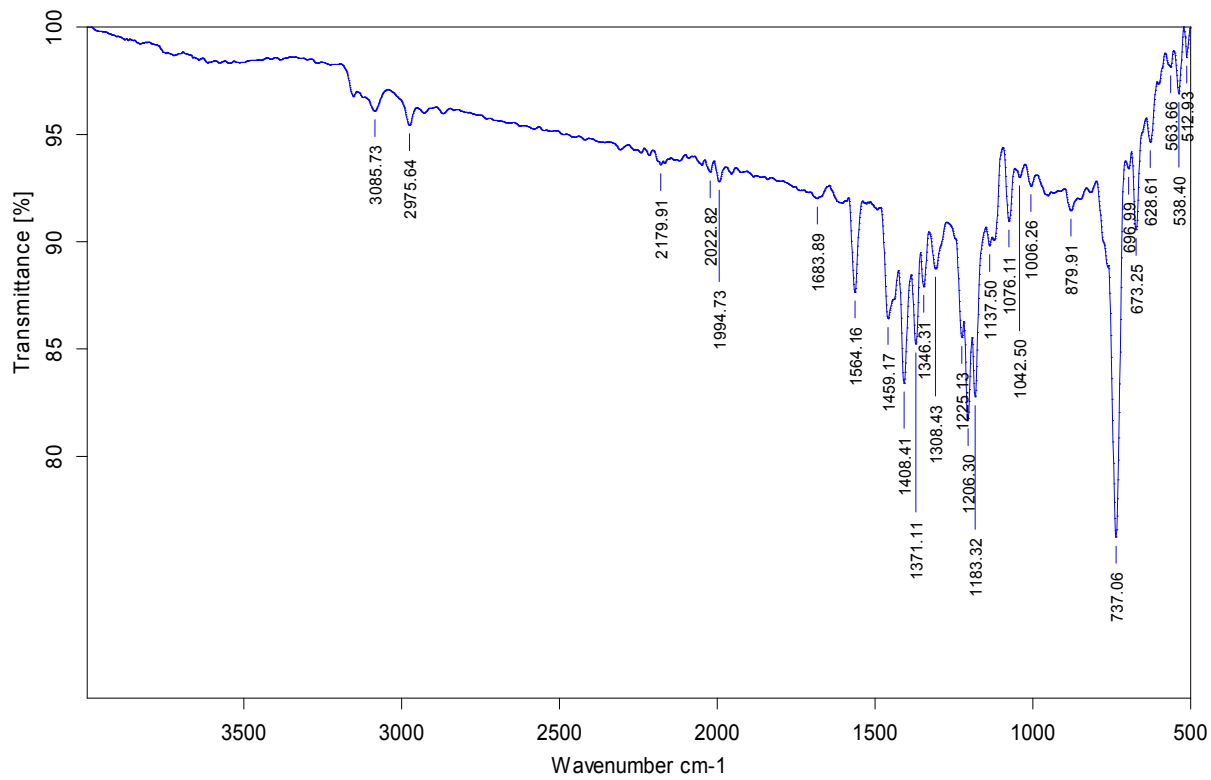

Fig. S38. Neat FT-IR spectrum of  $[(mbpis)Bi(Br)_2(\mu_2-Br)]_2 \cdot CH_3CN$  (12).

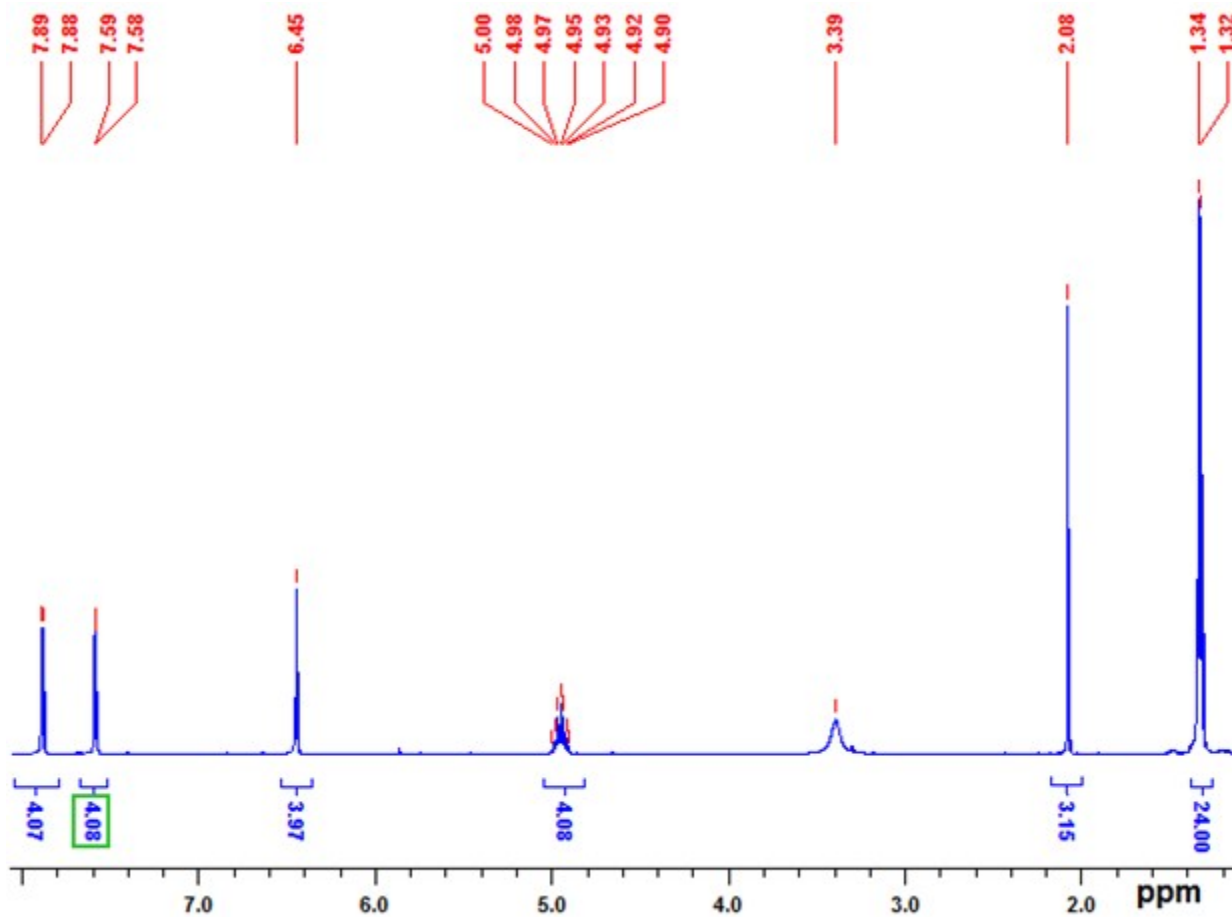

Fig. S39. <sup>1</sup>H NMR spectrum of [(mbpis)Bi(Br)<sub>2</sub>(μ<sub>2</sub>-Br)]<sub>2</sub>·CH<sub>3</sub>CN (**12**) in DMSO-d<sub>6</sub> at RT.

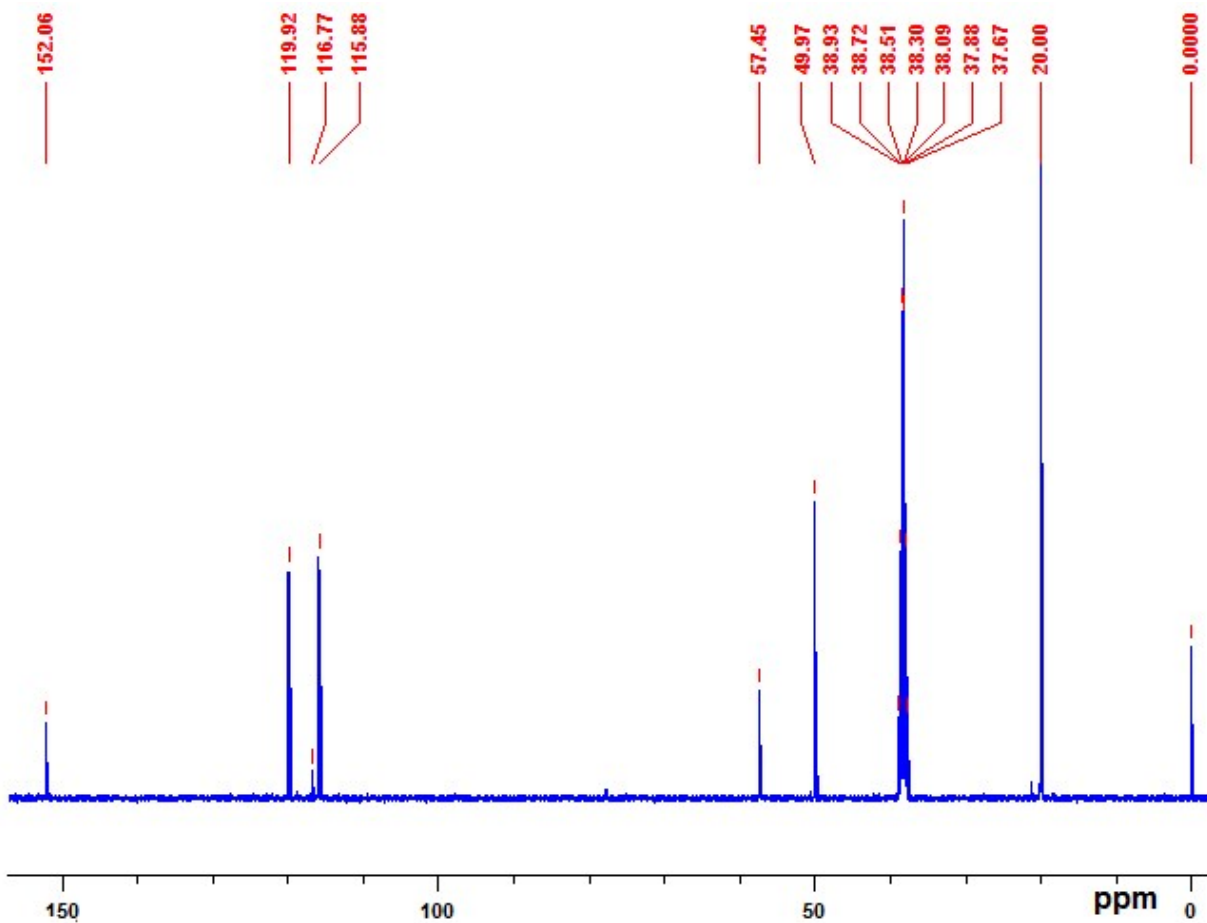

Fig. S40.  $^{13}\text{C}$  NMR spectrum of  $[(\text{mbpis})\text{Bi}(\text{Br})_2(\mu_2\text{-Br})]_2\cdot\text{CH}_3\text{CN}$  (**12**) in  $\text{DMSO-d}_6$  at RT.



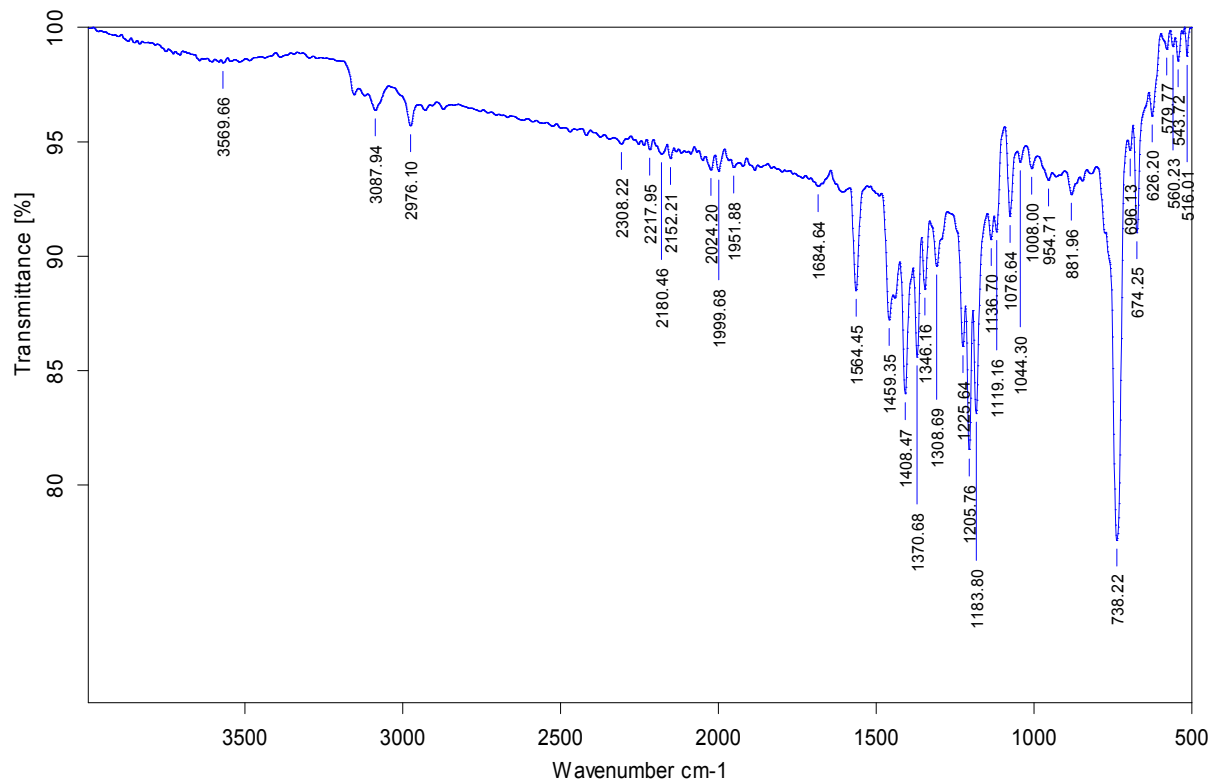

**Fig. S41.** Neat FT-IR spectrum of  $[(mbpis)Bi_2(Br)_3(\mu_2-Br_2)(\mu_3-Br)_2]_2 \cdot CH_3CN$  (**13**).

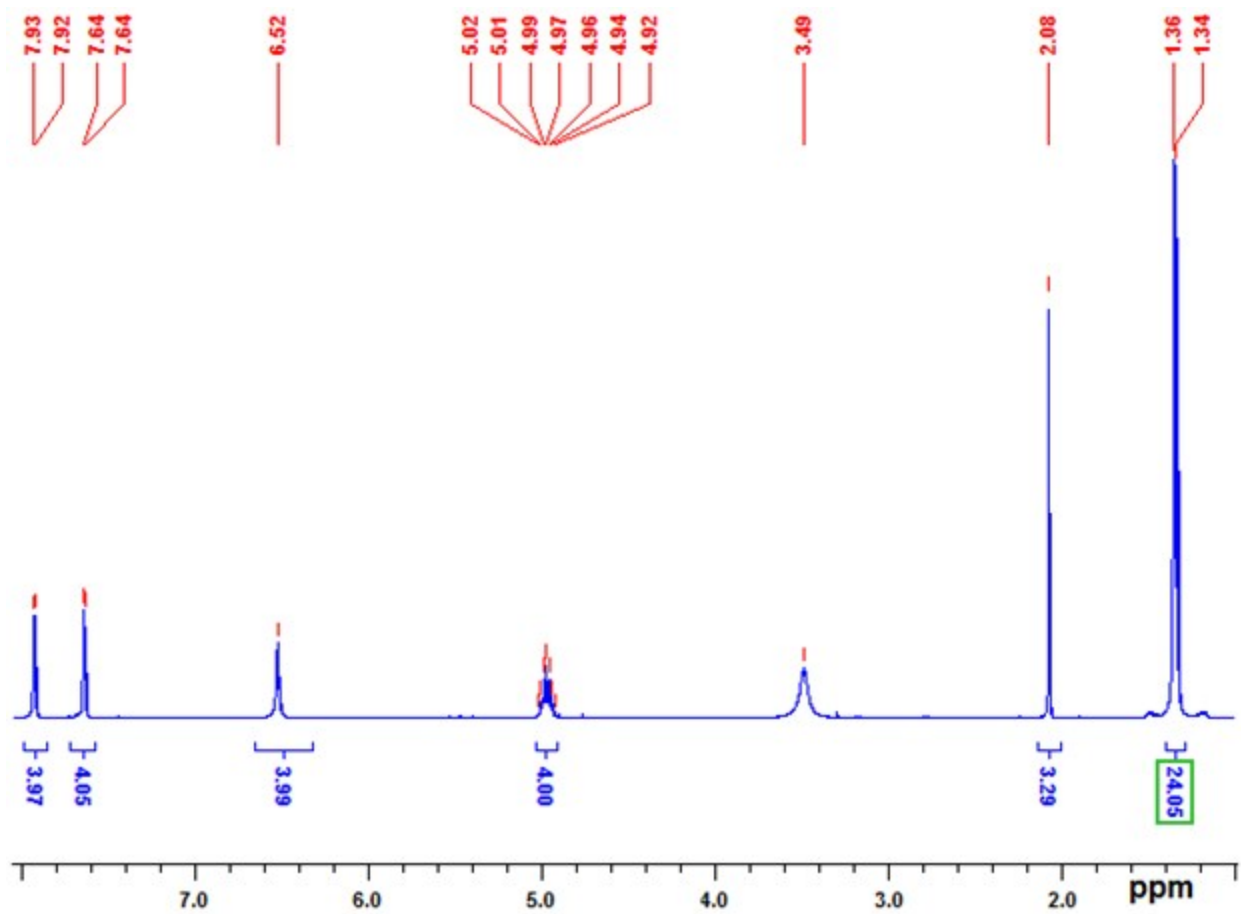

Fig. S42.  $^1\text{H}$  NMR spectrum of  $[(\text{mbpis})\text{Bi}_2(\text{Br})_3(\mu_2\text{-Br}_2)(\mu_3\text{-Br})_2]\cdot\text{CH}_3\text{CN}$  (13) in  $\text{DMSO-d}_6$  at RT.

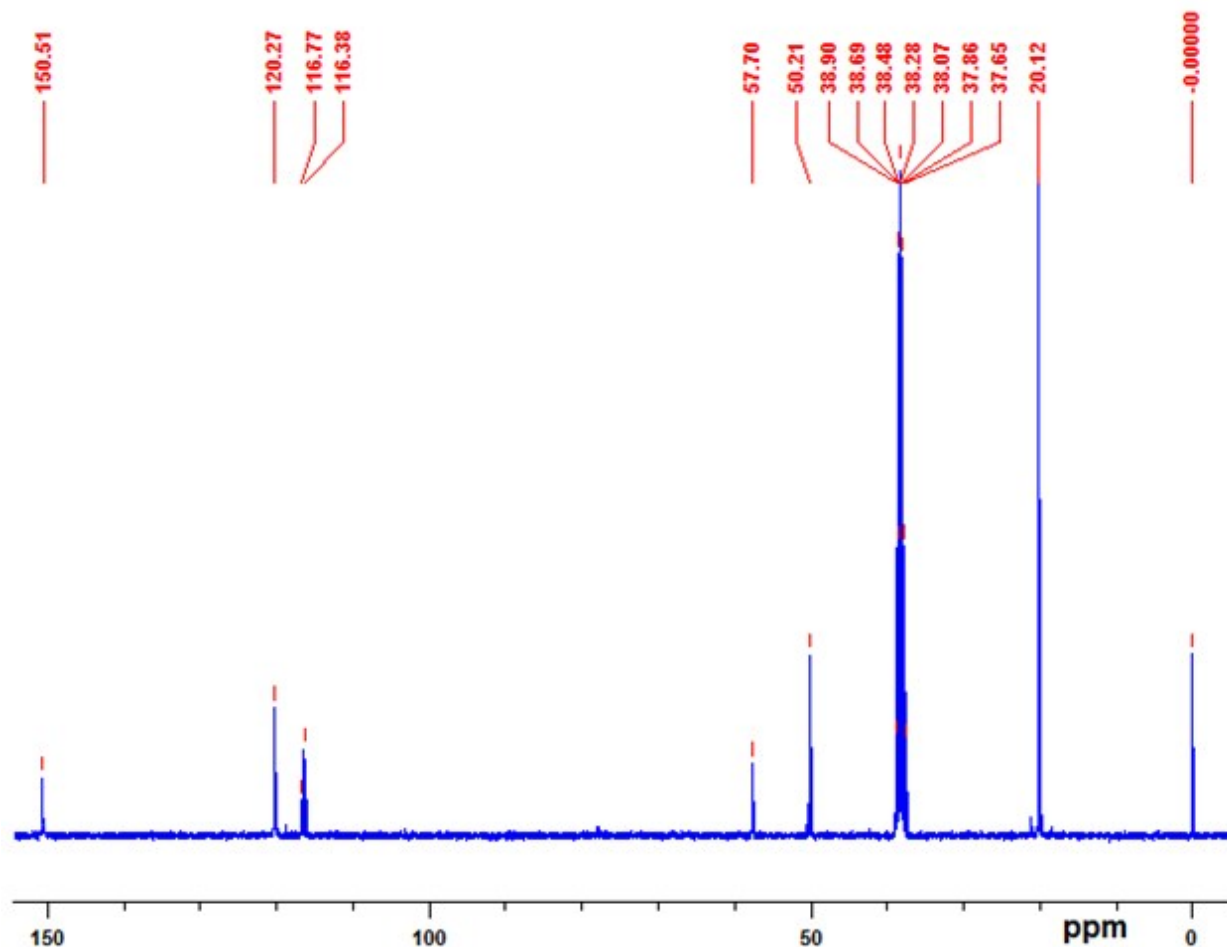

**Fig. S43.**  $^{13}\text{C}$  NMR spectrum of  $[(\text{mbpis})\text{Bi}_2(\text{Br})_3(\mu_2\text{-Br}_2)(\mu_3\text{-Br})_2]\cdot\text{CH}_3\text{CN}$  (**13**) in  $\text{DMSO-d}_6$  at RT.

### Catalysts 1-13 promoted triaryl- or tryheteroaryl methanes synthesis

The newly isolated bismuth(III) catalysts (**1-13**) were utilized for the synthesis of triaryl and tryheteroaryl methanes under very mild conditions. Bismuth(III) complex (0.050 mmol) was taken in a test tube along with arene or heteroarene (0.100 mmol) in toluene (0.50 mL) under ambient condition. Subsequently, the mixture was stirred at room temperature for 2-3 min followed by the addition of aromatic aldehyde (0.050 mmol). Finally, test tube wall was washed with toluene (0.50 mL) and allowed to stir at room temperature. The progress of reaction was continuously monitored by TLC. After the completion of the reaction, the crude mixture was purified by flash column chromatography to produce an expected product (eluent: gradient mixture of EtOAc/petroleum ether). The disappearance characteristic signals of starting materials and appearance characteristic peaks of products were conveniently surveyed by  $^1\text{H}$  NMR spectroscopy.

#### 1. 2,2'-(phenylmethylene)bis(1,3,5-trimethoxybenzene)<sup>i</sup>

Crystalline colorless solid, mp: 192-193 °C (decomposed to black);  $^1\text{H}$  NMR ( $\text{CDCl}_3$ ) 3.49 (s, 12H), 3.78 (s, 6H), 6.10 (s, 4H), 6.21 (s, 1H), 7.03-7.16 (m, 5H) (See Supporting Information 2, Fig. S2-1).

#### 2. 2,2'-(*p*-tolylmethylene)bis(1,3,5-trimethoxybenzene)<sup>ii</sup>

Off-white solid, mp: 133-134 °C (decomposed to black);  $^1\text{H}$  NMR (400 MHz,  $\text{CDCl}_3$ )  $\delta$  2.44 (s, 3H), 3.50 (s, 6H), 3.77 (s, 12H), 6.10 (s, 4H), 6.94-6.96 (d, 2H), 7.32-7.34 (d, 2H) (See Supporting Information 2, Fig. S2-2).

**3. 2,2'-((4-methoxyphenyl)methylene)bis(1,3,5-trimethoxybenzene)<sup>iii</sup>**

White solid, mp: 133-134 °C (decomposed to black); <sup>1</sup>H NMR (400 MHz, CDCl<sub>3</sub>) δ 3.50 (s, 3H), 3.76 (s, 12H), 3.78 (s, 6H), 6.10 (s, 4H), 6.16 (s, 1H), 7.03-7.04 (d, 2H), 7.17-7.19 (d, 2H) (See Supporting Information 2, Fig. S2-3).

**4. 2,2'-((4-nitrophenyl)methylene)bis(1,3,5-trimethoxybenzene)<sup>i</sup>**

Light yellow solid, mp: 156-158 °C (decomposed to black); <sup>1</sup>H NMR (400 MHz, CDCl<sub>3</sub>) δ 3.44 (s, 12H), 3.71 (s, 6H), 6.02 (s, 4H), 6.18 (s, 1H), 7.07-7.09 (d, 2H), 7.92-7.94 (d, 2H) (See Supporting Information 2, Fig. S2-4).

**5. 3,3'-(phenylmethylene)bis(1H-indole)<sup>iii</sup>**

Reddish brown solid, mp: 138-139 °C (decomposed to black); <sup>1</sup>H NMR (400 MHz, DMSO) δ 5.83 (s, 1H), 6.83-6.88 (m, 4H), 7.02-7.06 (d, 2H), 7.15-7.19 (m, 1H), 7.25-7.29 (m, 4H), 7.34-7.38 (m, 4H), 10.82 (s, 2H) (See Supporting Information 2, Fig. S2-5).

**6. 3,3'-(*p*-tolylmethylene)bis(1H-indole)<sup>iv</sup>**

Blood red solid, mp: 102–103 °C (decomposed to black); <sup>1</sup>H-NMR (400 MHz, CDCl<sub>3</sub>): δ 2.30 (s, 3H), 5.83 (s, 1H), 6.93 (s, 2H), 6.96-7.39 (m, 12H), 10.93 (s, 2H) (See Supporting Information 2, Fig. S2-6).

**7. 3,3'-((4-Methoxyphenyl)methylene)bis(1H-indole)<sup>v</sup>**

Pink solid, mp: 189-190 °C (decomposed to black); <sup>1</sup>H NMR (400 MHz, DMSO) δ 3.94 (s, 3H), 6.06 (s, 1H), 6.79-7.60 (m, 14H), 10.82 (s, 2H) (See Supporting Information 2, Fig. S2-7).

**8. 3,3'-((4-nitrophenyl)methylene)bis(1H-indole)<sup>vi</sup>**

Red solid, mp: 219–221 °C (decomposed to black); <sup>1</sup>H-NMR (400 MHz, DMSO): δ 6.03 (s, 1H), 6.86-6.90 (m, 4H), 7.03-7.07 (t, 2H), 7.28-7.30 (d, 2H), 7.36-7.38 (d, 2H), 7.60-7.62 (d, 2H), 8.13-8.16 (d, 2H), 10.93 (s, 2H) (See Supporting Information 2, Fig. S2-8).

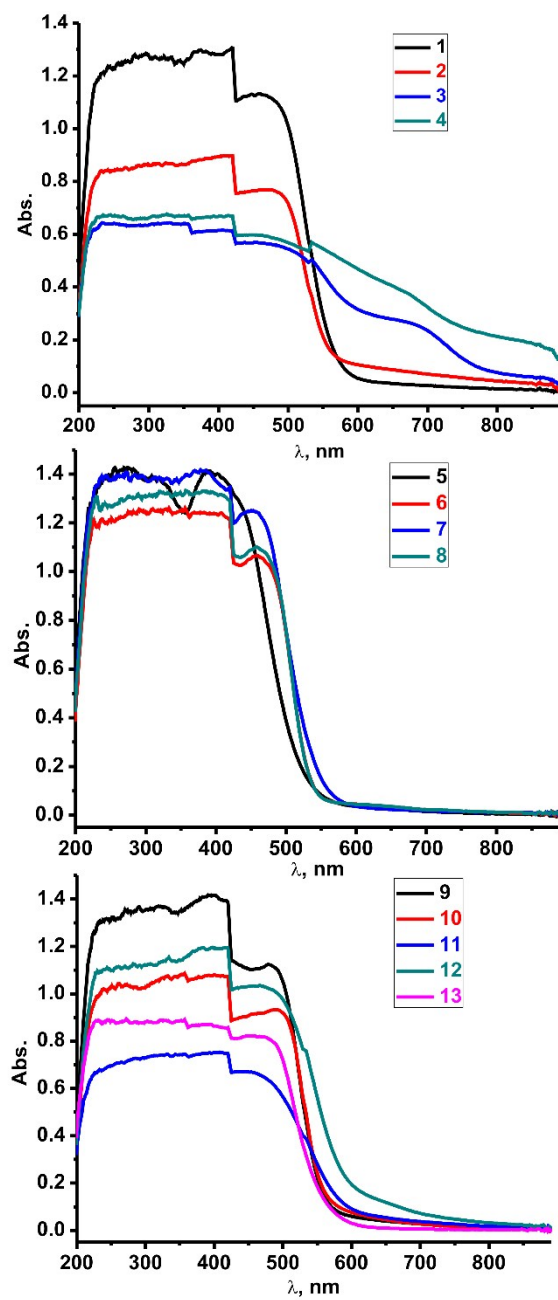

Fig. S44. Solid state UV-vis spectra of complexes 1-13 at 25 °C.

**Table S1.** Structural parameters of compounds **1-6**.

|                                                              | <b>1</b>                                                                                                            | <b>2</b>                                                                                                          | <b>3</b>                                                                                          | <b>4</b>                                                                                                          | <b>5</b>                                                                                             | <b>6</b>                                                                                         | <b>7</b>                                                                                          |
|--------------------------------------------------------------|---------------------------------------------------------------------------------------------------------------------|-------------------------------------------------------------------------------------------------------------------|---------------------------------------------------------------------------------------------------|-------------------------------------------------------------------------------------------------------------------|------------------------------------------------------------------------------------------------------|--------------------------------------------------------------------------------------------------|---------------------------------------------------------------------------------------------------|
| Empirical formula                                            | C <sub>39</sub> H <sub>48</sub> N <sub>12</sub> O <sub>47</sub> B<br>I <sub>7</sub> S <sub>19</sub> F <sub>39</sub> | C <sub>23</sub> H <sub>32</sub> BiF <sub>9</sub> N <sub>8</sub> O <sub>11</sub><br>S <sub>3</sub> Se <sub>4</sub> | C <sub>29</sub> H <sub>40</sub> N <sub>8</sub> O <sub>9</sub> F <sub>9</sub> S <sub>7</sub><br>Bi | C <sub>29</sub> H <sub>40</sub> N <sub>8</sub> O <sub>9</sub> F <sub>9</sub> S<br><sub>3</sub> Se <sub>4</sub> Bi | C <sub>54</sub> H <sub>73</sub> N <sub>24</sub> Bi <sub>4</sub> S <sub>12</sub> Cl <sub>1</sub><br>2 | C <sub>18</sub> H <sub>24</sub> N <sub>8</sub> S <sub>4</sub> Br <sub>6</sub><br>Bi <sub>2</sub> | C <sub>18</sub> H <sub>24</sub> N <sub>8</sub> Se <sub>4</sub> Cl<br><sub>6</sub> Bi <sub>2</sub> |
| Formula weight                                               | 6408.07                                                                                                             | 1388.56                                                                                                           | 1249.12                                                                                           | 1436.69                                                                                                           | 2704.49                                                                                              | 1378.09                                                                                          | 1286.86                                                                                           |
| Temperature (K)                                              | 150                                                                                                                 | 150                                                                                                               | 150                                                                                               | 150                                                                                                               | 293                                                                                                  | 293                                                                                              | 293                                                                                               |
| Crystal system                                               | Trigonal                                                                                                            | triclinic                                                                                                         | Monoclinic                                                                                        | Monoclinic                                                                                                        | Monoclinic                                                                                           | Monoclinic                                                                                       | monoclinic                                                                                        |
| Space group                                                  | <i>R</i> -3 <i>c</i>                                                                                                | <i>P</i> $\bar{1}$                                                                                                | <i>P</i> <sub>2</sub> / <i>n</i>                                                                  | <i>P</i> <sub>2</sub> / <i>n</i>                                                                                  | <i>C</i> 2/ <i>c</i>                                                                                 | <i>P</i> <sub>2</sub> / <i>c</i>                                                                 | <i>C</i> 2/ <i>m</i>                                                                              |
| <i>a</i> /Å                                                  | 30.7421(7)                                                                                                          | 9.0767(5)                                                                                                         | 15.1033(3)                                                                                        | 15.3075(6)                                                                                                        | 27.2866(11)                                                                                          | 9.393(2)                                                                                         | 14.559(5)                                                                                         |
| <i>b</i> /Å                                                  | 30.7421(7)                                                                                                          | 15.2872(8)                                                                                                        | 13.2707(3)                                                                                        | 13.2282(6)                                                                                                        | 27.1101(6)                                                                                           | 17.461(2)                                                                                        | 12.466(3)                                                                                         |
| <i>c</i> /Å                                                  | 70.888(2)                                                                                                           | 16.4710(7)                                                                                                        | 22.9733(4)                                                                                        | 23.4812(9)                                                                                                        | 29.9547(11)                                                                                          | 11.491(2)                                                                                        | 12.369(4)                                                                                         |
| $\alpha$ /°                                                  | 90                                                                                                                  | 71.308(4)                                                                                                         | 90                                                                                                | 90                                                                                                                | 90                                                                                                   | 90                                                                                               | 90                                                                                                |
| $\beta$ /°                                                   | 90                                                                                                                  | 86.504(4)                                                                                                         | 94.6380(16)                                                                                       | 94.758(4)                                                                                                         | 117.194(5)                                                                                           | 113.29(3)                                                                                        | 113.06(4)                                                                                         |
| $\gamma$ /°                                                  | 120                                                                                                                 | 82.217(4)                                                                                                         | 90                                                                                                | 90                                                                                                                | 90                                                                                                   | 90                                                                                               | 90                                                                                                |
| Volume (Å <sup>3</sup> )                                     | 58019(2)                                                                                                            | 2144.61(19)                                                                                                       | 4589.50(14)                                                                                       | 4738.4(3)                                                                                                         | 19709.5(15)                                                                                          | 1731.0(7)                                                                                        | 2065.6(13)                                                                                        |
| <i>Z</i>                                                     | 12                                                                                                                  | 2                                                                                                                 | 4                                                                                                 | 4                                                                                                                 | 8                                                                                                    | 2                                                                                                | 2                                                                                                 |
| $\rho_{\text{calc}}$ /mg mm <sup>-3</sup>                    | 2.2006                                                                                                              | 2.1501                                                                                                            | 1.8076                                                                                            | 2.0138                                                                                                            | 1.8227                                                                                               | 2.6438                                                                                           | 2.0688                                                                                            |
| Absorption coefficient ( $\mu$ /mm <sup>-1</sup> )           | 20.189                                                                                                              | 14.222                                                                                                            | 11.358                                                                                            | 12.868                                                                                                            | 19.514                                                                                               | 30.304                                                                                           | 24.306                                                                                            |
| <i>F</i> (000)                                               | 36339.3                                                                                                             | 1316.3                                                                                                            | 2474.7                                                                                            | 2744.6                                                                                                            | 10314.2                                                                                              | 1238.1                                                                                           | 1145.5                                                                                            |
| Reflections collected                                        | 42164                                                                                                               | 16544                                                                                                             | 17863                                                                                             | 20296                                                                                                             | 21580                                                                                                | 3383                                                                                             | 6258                                                                                              |
| <i>R</i> <sub>int</sub>                                      | 0.0549                                                                                                              | 0.0483                                                                                                            | 0.0305                                                                                            | 0.0477                                                                                                            | 0.0341                                                                                               | 0.0284                                                                                           | 0.1240                                                                                            |
| Data/restraints /parameters                                  | 12404/0/823                                                                                                         | 8065/0/538                                                                                                        | 8727/0/575                                                                                        | 8961/0/576                                                                                                        | 14572/0/967                                                                                          | 2520/0/173                                                                                       | 2031/0/92                                                                                         |
| GOF on <i>F</i> <sup>2</sup>                                 | 1.046                                                                                                               | 1.041                                                                                                             | 1.004                                                                                             | 1.033                                                                                                             | 1.022                                                                                                | 0.996                                                                                            | 1.979                                                                                             |
| <i>R</i> <sub>1</sub> ( <i>I</i> >2 $\sigma$ ( <i>I</i> ))   | 0.0391                                                                                                              | 0.0493                                                                                                            | 0.0344                                                                                            | 0.0361                                                                                                            | 0.0457                                                                                               | 0.0439                                                                                           | 0.2839                                                                                            |
| w <i>R</i> <sub>2</sub> ( <i>I</i> >2 $\sigma$ ( <i>I</i> )) | 0.0918                                                                                                              | 0.1285                                                                                                            | 0.0939                                                                                            | 0.1106                                                                                                            | 0.1126                                                                                               | 0.1054                                                                                           | 0.5764                                                                                            |
| <i>R</i> <sub>1</sub> values (all data)                      | 0.0498                                                                                                              | 0.0549                                                                                                            | 0.0363                                                                                            | 0.0473                                                                                                            | 0.0775                                                                                               | 0.0575                                                                                           | 0.3720                                                                                            |
| <i>R</i> <sub>2</sub> values (all data)                      | 0.0975                                                                                                              | 0.1350                                                                                                            | 0.0960                                                                                            | 0.1358                                                                                                            | 0.1377                                                                                               | 0.1192                                                                                           | 0.6593                                                                                            |

**Table S2.** Structural parameters of compounds **7-13**.

|  | <b>8</b> | <b>9</b> | <b>10</b> | <b>11</b> | <b>12</b> | <b>13</b> | <b>14</b> | <b>15</b> |
|--|----------|----------|-----------|-----------|-----------|-----------|-----------|-----------|
|--|----------|----------|-----------|-----------|-----------|-----------|-----------|-----------|

|                                                              |                                                                                                   |                                                                                                  |                                                                                      |                                                                                                   |                                                                                                    |                                                                                         |                                                     |                                                               |
|--------------------------------------------------------------|---------------------------------------------------------------------------------------------------|--------------------------------------------------------------------------------------------------|--------------------------------------------------------------------------------------|---------------------------------------------------------------------------------------------------|----------------------------------------------------------------------------------------------------|-----------------------------------------------------------------------------------------|-----------------------------------------------------|---------------------------------------------------------------|
| Empirical formula                                            | C <sub>18</sub> H <sub>24</sub> N <sub>4</sub> Bi <sub>2</sub> Se <sub>4</sub><br>Br <sub>6</sub> | C <sub>28</sub> H <sub>43</sub> N <sub>9</sub> S <sub>4</sub> Cl <sub>6</sub><br>Bi <sub>2</sub> | C <sub>28</sub> H <sub>43</sub> Bi <sub>2</sub> Br<br>6N <sub>9</sub> S <sub>4</sub> | C <sub>28</sub> H <sub>43</sub> N <sub>9</sub> Cl <sub>6</sub><br>Se <sub>4</sub> Bi <sub>2</sub> | C <sub>28</sub> H <sub>43</sub> N <sub>9</sub> S<br>e <sub>4</sub> Bi <sub>2</sub> Br <sub>6</sub> | C <sub>30</sub> H <sub>46</sub> Bi <sub>4</sub> Br<br>12N <sub>10</sub> Se <sub>4</sub> | C <sub>31</sub> H <sub>40</sub> N<br>O <sub>8</sub> | C <sub>23</sub> H <sub>17</sub> N <sub>3</sub> O <sub>2</sub> |
| Formula weight                                               | 1563.65                                                                                           | 1261.63                                                                                          | 1528.34                                                                              | 1449.20                                                                                           | 1715.91                                                                                            | 2657.37                                                                                 | 512.58                                              | 367.41                                                        |
| Temperature (K)                                              | 293                                                                                               | 293                                                                                              | 293                                                                                  | 293                                                                                               | 293                                                                                                | 150                                                                                     | 293                                                 | 293                                                           |
| Crystal system                                               | monoclinic                                                                                        | tetragonal                                                                                       | tetragonal                                                                           | tetragonal                                                                                        | tetragonal                                                                                         | monoclinic                                                                              | triclinic                                           | monoclinic                                                    |
| Space group                                                  | <i>P</i> 2 <sub>1</sub> / <i>n</i>                                                                | <i>P</i> 4 <sub>2</sub> / <i>ncm</i>                                                             | <i>P</i> 4 <sub>2</sub> / <i>ncm</i>                                                 | <i>P</i> 4 <sub>2</sub> / <i>ncm</i>                                                              | <i>P</i> 4 <sub>2</sub> / <i>ncm</i>                                                               | <i>P</i> 2 <sub>1</sub> / <i>c</i>                                                      | <i>P</i> $\bar{1}$                                  | <i>I</i> 2/ <i>a</i>                                          |
| <i>a</i> /Å                                                  | 9.549(2)                                                                                          | 19.00307(17)                                                                                     | 19.2248(3)                                                                           | 19.04444(18)                                                                                      | 19.2323(2)                                                                                         | 12.54238(19)                                                                            | 8.0626(4)                                           | 17.2917(6)                                                    |
| <i>b</i> /Å                                                  | 17.6588(8)                                                                                        | 19.00307(17)                                                                                     | 19.2248(3)                                                                           | 19.04444(18)                                                                                      | 19.2323(2)                                                                                         | 21.6905(3)                                                                              | 12.3582(8)                                          | 10.6763(4)                                                    |
| <i>c</i> /Å                                                  | 17.763(5)                                                                                         | 12.04528(15)                                                                                     | 12.2798(3)                                                                           | 12.15557(19)                                                                                      | 12.4100(2)                                                                                         | 12.37785(18)                                                                            | 13.8011(9)                                          | 39.6733(15)                                                   |
| $\alpha$ /°                                                  | 90                                                                                                | 90                                                                                               | 90                                                                                   | 90                                                                                                | 90                                                                                                 | 90                                                                                      | 91.927(5)                                           | 90                                                            |
| $\beta$ /°                                                   | 143.57(6)                                                                                         | 90                                                                                               | 90                                                                                   | 90                                                                                                | 90                                                                                                 | 107.2678(16)                                                                            | 99.512(5)                                           | 91.757(4)                                                     |
| $\gamma$ /°                                                  | 90                                                                                                | 90                                                                                               | 90                                                                                   | 90                                                                                                | 90                                                                                                 | 90                                                                                      | 101.537(5)                                          | 90                                                            |
| Volume (Å <sup>3</sup> )                                     | 1779(2)                                                                                           | 4349.75 (8)                                                                                      | 4538.55 (15)                                                                         | 4408.71 (9)                                                                                       | 4590.22 (11)                                                                                       | 3215.62(8)                                                                              | 1325.66(14)                                         | 7320.7(5)                                                     |
| <i>Z</i>                                                     | 4                                                                                                 | 4                                                                                                | 4                                                                                    | 4                                                                                                 | 4                                                                                                  | 2                                                                                       | 2                                                   | 16                                                            |
| $\rho_{\text{calc}}$ /mg mm <sup>-3</sup>                    | 2.8778                                                                                            | 1.9264                                                                                           | 2.2366                                                                               | 2.1832                                                                                            | 2.4828                                                                                             | 2.7443                                                                                  | 1.2840                                              | 1.3333                                                        |
| Absorption coefficient ( $\mu$ /mm <sup>-1</sup> )           | 31.974                                                                                            | 21.151                                                                                           | 23.211                                                                               | 22.875                                                                                            | 24.877                                                                                             | 32.666                                                                                  | 0.776                                               | 0.087                                                         |
| <i>F</i> (000)                                               | 1325.1                                                                                            | 2401.6                                                                                           | 2808.7                                                                               | 2671.6                                                                                            | 3078.6                                                                                             | 2320.0                                                                                  | 547.9                                               | 3073.4                                                        |
| Reflections collected                                        | 3330                                                                                              | 9430                                                                                             | 11356                                                                                | 9141                                                                                              | 9414                                                                                               | 14054                                                                                   | 8480                                                | 21069                                                         |
| <i>R</i> <sub>int</sub>                                      | 0.0645                                                                                            | 0.0381                                                                                           | 0.0543                                                                               | 0.0334                                                                                            | 0.0370                                                                                             | 0.0442                                                                                  | 0.0170                                              | 0.0525                                                        |
| Data/restraints /parameters                                  | 2477/0/173                                                                                        | 2182/0/125                                                                                       | 2269/0/12<br>4                                                                       | 2201/0/12<br>5                                                                                    | 2291/0/12<br>5                                                                                     | 6092/0/27<br>9                                                                          | 5015/0/<br>341                                      | 8475/0/505                                                    |
| GOF on <i>F</i> <sup>2</sup>                                 | 3.110                                                                                             | 1.014                                                                                            | 1.015                                                                                | 1.013                                                                                             | 0.994                                                                                              | 0.979                                                                                   | 1.081                                               | 1.055                                                         |
| <i>R</i> <sub>1</sub> ( <i>I</i> >2 $\sigma$ ( <i>I</i> ))   | 0.2524                                                                                            | 0.0347                                                                                           | 0.0432                                                                               | 0.0297                                                                                            | 0.0288                                                                                             | 0.0478                                                                                  | 0.0610                                              | 0.0776                                                        |
| w <i>R</i> <sub>2</sub> ( <i>I</i> >2 $\sigma$ ( <i>I</i> )) | 0.5931                                                                                            | 0.0897                                                                                           | 0.1234                                                                               | 0.0761                                                                                            | 0.0707                                                                                             | 0.1268                                                                                  | 0.1799                                              | 0.2182                                                        |
| <i>R</i> <sub>1</sub> values (all data)                      | 0.3176                                                                                            | 0.0437                                                                                           | 0.0516                                                                               | 0.0336                                                                                            | 0.0342                                                                                             | 0.0566                                                                                  | 0.0713                                              | 0.1578                                                        |



|                         |        |        |        |        |        |        |        |        |
|-------------------------|--------|--------|--------|--------|--------|--------|--------|--------|
| $R_2$ values (all data) | 0.6659 | 0.0973 | 0.1351 | 0.0795 | 0.0746 | 0.1371 | 0.1964 | 0.2932 |
|-------------------------|--------|--------|--------|--------|--------|--------|--------|--------|

---

<sup>i</sup> V. Nair, K. G. Abhilash and N. Vidya., *Org. Lett.*, 2005, **7**, 5857-5859.

<sup>ii</sup> B. M. Babu, P. B. Thakur, N. N. Rao, G. S. Kumar and H. M. Meshram., *Tet. Lett.* 2014, **55**, 1868–1872.

<sup>iii</sup> P. Thirupathi and S. S. Kim., *J. Org. Chem.* 2010, **75**, 5240–5249.

<sup>iv</sup> P. Thirupathi and S. S. Kim., *J. Org. Chem.* 2009, **74**, 7755–7761.

<sup>v</sup> E. L. Armstrong, H. K. Grover and M. A. Kerr., *J. Org. Chem.* 2013, **78**, 10534–10540.

<sup>vi</sup> A. Z. Halimehjani, S. E. Hooshmand and E. V. Shamiri., *RSC Adv.*, 2015, **5**, 21772–21777.
